# Supplementary material for: Shake and bake: a robust and cost-effective proteomic sample preparation workflow for plasma and cerebrospinal fluid
Source: Clin Proteomics. 2026 Feb 15;23:12. doi: 10.1186/s12014-026-09589-1 (PMC12927225; doi:10.1186/s12014-026-09589-1)
Supplement: Supplementary file 1 — Supplementary Material 1 [file 12014_2026_9589_MOESM1_ESM.xlsx]

## Sheet: S.Table1 decreasing proteins
Accession	Description	Gene.Symbol	median ratio (abundance depleted sample/undepleted sample)	targeted for depletion (x = YES)	Abundances [R/P = 0]	Abundances [R/P = 10]	Abundances [R/P = 25]	Abundances [R/P = 75]	Abundances [R/P = 1000]	Abundances [R/P = 1500]	Abundances [R/P = 2000]	ratio (abundance R/P=0 / abundance R/P=0)	ratio (abundance R/P=10 / abundance R/P=0)	ratio (abundance R/P=25 / abundance R/P=0)	ratio (abundance R/P=75 / abundance R/P=0)	ratio (abundance R/P=1000 / abundance R/P=0)	ratio (abundance R/P=1500 / abundance R/P=0)	ratio (abundance R/P=2000 / abundance R/P=0)
A0A075B6H7	Probable non-functional immunoglobulin kappa variable 3-7 [OS=Homo sapiens]	IGKV3-7	0.17609	x	433.3	165.3	76.3	#N/A	#N/A	25.1	#N/A	1	0.381491	0.17609	#N/A	#N/A	0.0579275	#N/A
A0A075B6I9	Immunoglobulin lambda variable 7-46 [OS=Homo sapiens]	IGLV7-46	0.288821	x	443.7	188.3	68	#N/A	#N/A	#N/A	#N/A	1	0.424386	0.153257	#N/A	#N/A	#N/A	#N/A
A0A075B6K4	Immunoglobulin lambda variable 3-10 [OS=Homo sapiens]	IGLV3-10	0.987984	x	149.8	#N/A	86.7	167.6	#N/A	157.4	138.6	1	#N/A	0.578772	1.11883	#N/A	1.05073	0.925234
A0A075B6K5	Immunoglobulin lambda variable 3-9 [OS=Homo sapiens]	IGLV3-9	0.167302	x	524.5	103.3	72.2	#N/A	#N/A	#N/A	#N/A	1	0.196949	0.137655	#N/A	#N/A	#N/A	#N/A
A0A0A0MRZ8	Immunoglobulin kappa variable 3D-11 [OS=Homo sapiens]	IGKV3D-11	0.209816	x	466.6	122.1	97.9	13.5	#N/A	#N/A	#N/A	1	0.26168	0.209816	0.0289327	#N/A	#N/A	#N/A
A0A0B4J1U7	Immunoglobulin heavy variable 6-1 [OS=Homo sapiens]	IGHV6-1	0.506325	x	347.8	205.2	147	#N/A	#N/A	#N/A	#N/A	1	0.589994	0.422657	#N/A	#N/A	#N/A	#N/A
A0A0B4J1V0	Immunoglobulin heavy variable 3-15 [OS=Homo sapiens]	IGHV3-15	0.194307	x	504.1	99.5	96.4	#N/A	#N/A	#N/A	#N/A	1	0.197381	0.191232	#N/A	#N/A	#N/A	#N/A
A0A0B4J1X5	Immunoglobulin heavy variable 3-74 [OS=Homo sapiens]	IGHV3-74	0.320708	x	426.4	183.6	89.9	#N/A	#N/A	#N/A	#N/A	1	0.430582	0.210835	#N/A	#N/A	#N/A	#N/A
A0A0C4DH25	Immunoglobulin kappa variable 3D-20 [OS=Homo sapiens]	IGKV3D-20	0.318639	x	427.6	142.4	130.1	#N/A	#N/A	#N/A	#N/A	1	0.333022	0.304256	#N/A	#N/A	#N/A	#N/A
A0A0C4DH31	Immunoglobulin heavy variable 1-18 [OS=Homo sapiens]	IGHV1-18	0.402294	x	387.9	204	108.1	#N/A	#N/A	#N/A	#N/A	1	0.525909	0.27868	#N/A	#N/A	#N/A	#N/A
A0A0C4DH38	Immunoglobulin heavy variable 5-51 [OS=Homo sapiens]	IGHV5-51	0.182527	x	512.8	109.8	77.4	#N/A	#N/A	#N/A	#N/A	1	0.214119	0.150936	#N/A	#N/A	#N/A	#N/A
E7ETH6	Zinc finger protein 587B [OS=Homo sapiens]	ZNF587B	0.440642		165.1	181.2	101.4	44.1	12.8	20.3	175	1	1.09752	0.614173	0.267111	0.0775288	0.122956	1.05996
O00299	Chloride intracellular channel protein 1 [OS=Homo sapiens]	CLIC1	0.46818		224.7	#N/A	171.6	142.4	27.7	28.5	105.2	1	#N/A	0.763685	0.633734	0.123275	0.126836	0.46818
O00533	Neural cell adhesion molecule L1-like protein [OS=Homo sapiens]	CHL1	0.900673		59.4	53.5	41.8	240.4	#N/A	254.3	50.6	1	0.900673	0.703704	4.04714	#N/A	4.28114	0.851852
O14791	Apolipoprotein L1 [OS=Homo sapiens]	APOL1	0.764975		120.2	28.9	81.7	102.2	153.5	139.5	74	1	0.240433	0.6797	0.85025	1.27704	1.16057	0.615641
O43866	CD5 antigen-like [OS=Homo sapiens]	CD5L	0.30128		320.3	101.1	172.9	1.6	96.5	7.6	#N/A	1	0.315642	0.539806	0.00499532	0.30128	0.0237278	#N/A
P00738	Haptoglobin [OS=Homo sapiens]	HP	0.0112561	x	528.6	84.5	68.4	6.9	5	3.6	3	1	0.159856	0.129398	0.0130533	0.00945895	0.00681044	0.00567537
P00739	Haptoglobin-related protein [OS=Homo sapiens]	HPR	0.254528		463.8	104.5	131.6	#N/A	#N/A	#N/A	#N/A	1	0.225313	0.283743	#N/A	#N/A	#N/A	#N/A
P01009	Alpha-1-antitrypsin [OS=Homo sapiens]	SERPINA1	0.171638	x	355.4	39.8	31.6	69.1	60.2	82.2	61.8	1	0.111986	0.0889139	0.194429	0.169387	0.231289	0.173889
P01023	Alpha-2-macroglobulin [OS=Homo sapiens]	A2M	0.0341253	x	463	93.1	84.8	16.1	15.5	14.7	12.9	1	0.20108	0.183153	0.0347732	0.0334773	0.0317495	0.0278618
P01591	Immunoglobulin J chain [OS=Homo sapiens]	JCHAIN	0.50618	x	347.9	175.8	176.4	#N/A	#N/A	#N/A	#N/A	1	0.505318	0.507042	#N/A	#N/A	#N/A	#N/A
P01593	Immunoglobulin kappa variable 1D-33 [OS=Homo sapiens]	IGKV1D-33	0.230384	x	479.2	152.4	68.4	#N/A	#N/A	#N/A	#N/A	1	0.31803	0.142738	#N/A	#N/A	#N/A	#N/A
P01619	Immunoglobulin kappa variable 3-20 [OS=Homo sapiens]	IGKV3-20	0.083234	x	503.4	97.7	65.7	15.1	#N/A	18.1	#N/A	1	0.19408	0.130513	0.029996	#N/A	0.0359555	#N/A
P01700	Immunoglobulin lambda variable 1-47 [OS=Homo sapiens]	IGLV1-47	0.178426	x	515.9	116.8	67.3	#N/A	#N/A	#N/A	#N/A	1	0.2264	0.130452	#N/A	#N/A	#N/A	#N/A
P01772	Immunoglobulin heavy variable 3-33 [OS=Homo sapiens]	IGHV3-33	0.200409	x	489	105.7	98	#N/A	#N/A	7.3	#N/A	1	0.216155	0.200409	#N/A	#N/A	0.0149284	#N/A
P01780	Immunoglobulin heavy variable 3-7 [OS=Homo sapiens]	IGHV3-7	0.236173	x	401.4	182.5	94.8	21.3	#N/A	#N/A	#N/A	1	0.454659	0.236173	0.0530643	#N/A	#N/A	#N/A
P01834	Immunoglobulin kappa constant [OS=Homo sapiens]	IGKC	0.0263084	x	355.4	254.3	57.5	8.7	7.8	6.2	10	1	0.715532	0.16179	0.0244795	0.0219471	0.0174451	0.0281373
P01859	Immunoglobulin heavy constant gamma 2 [OS=Homo sapiens]	IGHG2	0.0116667	x	510	100.9	69.9	7.2	3.9	3.4	4.7	1	0.197843	0.137059	0.0141176	0.00764706	0.00666667	0.00921569
P01860	Immunoglobulin heavy constant gamma 3 [OS=Homo sapiens]	IGHG3	0.00179387	x	613.2	56.5	27	1.2	0.6	0.5	1	1	0.0921396	0.0440313	0.00195695	0.000978474	0.000815395	0.00163079
P01861	Immunoglobulin heavy constant gamma 4 [OS=Homo sapiens]	IGHG4	0.00793002	x	611.6	78.1	9	0.7	0.7	#N/A	#N/A	1	0.127698	0.0147155	0.00114454	0.00114454	#N/A	#N/A
P01871	Immunoglobulin heavy constant mu [OS=Homo sapiens]	IGHM	0.0793505	x	326.4	112	201.2	15.2	4.2	4.5	36.6	1	0.343137	0.616422	0.0465686	0.0128676	0.0137868	0.112132
P01876	Immunoglobulin heavy constant alpha 1 [OS=Homo sapiens]	IGHA1	0.0524098	x	379.7	132.5	121.9	22	17.8	14.8	11.5	1	0.34896	0.321043	0.0579405	0.0468791	0.0389781	0.0302871
P01880	Immunoglobulin heavy constant delta [OS=Homo sapiens]	IGHD	0.159725	x	530.6	132.2	37.3	#N/A	#N/A	#N/A	#N/A	1	0.249152	0.0702978	#N/A	#N/A	#N/A	#N/A
P02671	Fibrinogen alpha chain [OS=Homo sapiens]	FGA	0.0776614	x	401.1	99.5	120.9	9.6	45.8	6.5	16.5	1	0.248068	0.301421	0.0239342	0.114186	0.0162054	0.0411369
P02675	Fibrinogen beta chain [OS=Homo sapiens]	FGB	0.0220479	x	471.7	95.9	103.8	10.9	4	3.8	9.9	1	0.203307	0.220055	0.0231079	0.00847997	0.00805597	0.0209879
P02679	Fibrinogen gamma chain [OS=Homo sapiens]	FGG	0.0360259	x	401.1	116.9	138.9	9.9	8	6.2	19	1	0.291449	0.346298	0.0246821	0.0199452	0.0154575	0.0473697
P02763	Alpha-1-acid glycoprotein 1 [OS=Homo sapiens]	ORM1	0.100252	x	515.7	85.9	51.7	#N/A	#N/A	#N/A	46.7	1	0.16657	0.100252	#N/A	#N/A	#N/A	0.0905565
P02768	Albumin [OS=Homo sapiens]	ALB	0.174187	x	206.1	220.6	171.5	28.5	15.2	14.6	43.3	1	1.07035	0.83212	0.138282	0.0737506	0.0708394	0.210092
P02787	Serotransferrin [OS=Homo sapiens]	TF	0.0632987	x	500.8	50.8	21.7	33.4	29.9	32	31.4	1	0.101438	0.0433307	0.0666933	0.0597045	0.0638978	0.0626997
P04439	HLA class I histocompatibility antigen, A alpha chain [OS=Homo sapiens]	HLA-A	0.114561		476.6	#N/A	28.3	54.6	10.4	66.9	63.3	1	#N/A	0.0593789	0.114561	0.0218212	0.140369	0.132816
P06310	Immunoglobulin kappa variable 2-30 [OS=Homo sapiens]	IGKV2-30	0.861865	x	143.7	49.3	259.2	128.4	#N/A	#N/A	119.3	1	0.343076	1.80376	0.893528	#N/A	#N/A	0.830202
P06312	Immunoglobulin kappa variable 4-1 [OS=Homo sapiens]	IGKV4-1	0.132319	x	348.4	249.7	79.4	9.7	12.8	#N/A	#N/A	1	0.716705	0.227899	0.0278416	0.0367394	#N/A	#N/A
P06331	Immunoglobulin heavy variable 4-34 [OS=Homo sapiens]	IGHV4-34	0.393213	x	391.9	116.9	191.3	#N/A	#N/A	#N/A	#N/A	1	0.29829	0.488135	#N/A	#N/A	#N/A	#N/A
P08567	Pleckstrin [OS=Homo sapiens]	PLEK	0.259928		193.9	66.3	43.6	#N/A	30.6	50.4	315.2	1	0.341929	0.224858	#N/A	0.157813	0.259928	1.62558
P0DJI8	Serum amyloid A-1 protein [OS=Homo sapiens]	SAA1	0.875117		106.5	153	74.1	78	101.3	102	85.1	1	1.43662	0.695775	0.732394	0.951174	0.957746	0.799061
P0DOX2	Immunoglobulin alpha-2 heavy chain [OS=Homo sapiens]		0.266377	x	195.4	132.4	216.5	49	55.1	27.7	23.9	1	0.677584	1.10798	0.250768	0.281986	0.14176	0.122313
P0DOX3	Immunoglobulin delta heavy chain [OS=Homo sapiens]		0.0198159	x	532.4	73	58.6	9.8	11.3	8.6	6.3	1	0.137115	0.110068	0.0184072	0.0212246	0.0161533	0.0118332
P0DOX5	Immunoglobulin gamma-1 heavy chain [OS=Homo sapiens]		0.0104338	x	546.3	82.9	53.2	4.1	4	2.3	7.3	1	0.151748	0.0973824	0.00750503	0.00732198	0.00421014	0.0133626
P0DOX7	Immunoglobulin kappa light chain [OS=Homo sapiens]		0.0614444	x	450	131.4	42.6	11.4	12.7	8.4	43.5	1	0.292	0.0946667	0.0253333	0.0282222	0.0186667	0.0966667
P0DOX8	Immunoglobulin lambda-1 light chain [OS=Homo sapiens]		0.00966312	x	564	78.2	38.5	4.3	6.6	4.2	4.2	1	0.138652	0.0682624	0.00762411	0.0117021	0.00744681	0.00744681
P0DOY3	Immunoglobulin lambda constant 3 [OS=Homo sapiens]	IGLC3	0.0243925	x	530.9	68.4	63.6	14.2	9.4	1.9	11.7	1	0.128838	0.119797	0.026747	0.0177058	0.00357883	0.022038
P0DP09	Immunoglobulin kappa variable 1-13 [OS=Homo sapiens]	IGKV1-13	0.113497	x	570.5	97.8	31.7	#N/A	#N/A	#N/A	#N/A	1	0.171429	0.0555653	#N/A	#N/A	#N/A	#N/A
P11597	Cholesteryl ester transfer protein [OS=Homo sapiens]	CETP	0.316492		191	130.4	94.3	12.8	26.6	17.9	226.9	1	0.682723	0.493717	0.0670157	0.139267	0.0937173	1.18796
P19652	Alpha-1-acid glycoprotein 2 [OS=Homo sapiens]	ORM2	0.145965		349.4	103	50.1	8.6	51.9	14.8	122.1	1	0.294791	0.143389	0.0246136	0.14854	0.0423583	0.349456
P39060	Collagen alpha-1(XVIII) chain [OS=Homo sapiens]	COL18A1	0.650723		304.2	165.6	#N/A	#N/A	#N/A	#N/A	230.3	1	0.544379	#N/A	#N/A	#N/A	#N/A	0.757068
P55058	Phospholipid transfer protein [OS=Homo sapiens]	PLTP	0.907407		108	49.3	80.9	150.4	55.6	140.7	115.1	1	0.456481	0.749074	1.39259	0.514815	1.30278	1.06574
P68871	Hemoglobin subunit beta [OS=Homo sapiens]	HBB	0.126312		390.7	21.5	35.9	57.7	41	95.3	57.9	1	0.0550294	0.0918864	0.147684	0.10494	0.243921	0.148196
P69905	Hemoglobin subunit alpha [OS=Homo sapiens]	HBA1; HBA2	0.118831		417.4	34.1	47.6	33.4	56.2	59.7	51.6	1	0.0816962	0.114039	0.0800192	0.134643	0.143028	0.123622
Q15166	Serum paraoxonase/lactonase 3 [OS=Homo sapiens]	PON3	0.370009		220.4	89.3	49.3	83.1	74.8	103.1	80	1	0.405172	0.223684	0.377042	0.339383	0.467786	0.362976
Q969T7	7-methylguanosine phosphate-specific 5'-nucleotidase [OS=Homo sapiens]	NT5C3B	0.149224		328.7	35.8	237.4	#N/A	#N/A	54.6	43.5	1	0.108914	0.722239	#N/A	#N/A	0.166109	0.13234
Q9HDC9	Adipocyte plasma membrane-associated protein [OS=Homo sapiens]	APMAP	0.834388		189.6	94.7	#N/A	#N/A	257.4	158.2	#N/A	1	0.499473	#N/A	#N/A	1.35759	0.834388	#N/A

## Sheet: S.Table 2 unique dep proteins
PG.ProteinGroups	PG.Genes	PG.ProteinDescriptions
A0A075B6H7	IGKV3-7	Probable non-functional immunoglobulin kappa variable 3-7
A0A1B0GTC6	C3orf85	Uncharacterized protein C3orf85
A0FGR8	ESYT2	Extended synaptotagmin-2
O00161	SNAP23	Synaptosomal-associated protein 23
O00462	MANBA	Beta-mannosidase
O00487	PSMD14	26S proteasome non-ATPase regulatory subunit 14
O00501	CLDN5	Claudin-5
O00584	RNASET2	Ribonuclease T2
O00592	PODXL	Podocalyxin
O00602	FCN1	Ficolin-1
O14579	COPE	Coatomer subunit epsilon
O14618	CCS	Copper chaperone for superoxide dismutase
O14672	ADAM10	Disintegrin and metalloproteinase domain-containing protein 10
O14974	PPP1R12A	Protein phosphatase 1 regulatory subunit 12A
O15031	PLXNB2	Plexin-B2
O15117	FYB1	FYN-binding protein 1
O15260	SURF4	Surfeit locus protein 4
O15335	CHAD	Chondroadherin
O15394	NCAM2	Neural cell adhesion molecule 2
O15400	STX7	Syntaxin-7
O15533	TAPBP	Tapasin
O43169	CYB5B	Cytochrome b5 type B
O43278	SPINT1	Kunitz-type protease inhibitor 1
O43396	TXNL1	Thioredoxin-like protein 1
O43399	TPD52L2	Tumor protein D54
O43488	AKR7A2	Aflatoxin B1 aldehyde reductase member 2
O43493	TGOLN2	Trans-Golgi network integral membrane protein 2
O43504	LAMTOR5	Ragulator complex protein LAMTOR5
O43505	B4GAT1	Beta-1,4-glucuronyltransferase 1
O43516	WIPF1	WAS/WASL-interacting protein family member 1
O43639	NCK2	Cytoplasmic protein NCK2
O43665	RGS10	Regulator of G-protein signaling 10
O43681	GET3	ATPase GET3
O43747	AP1G1	AP-1 complex subunit gamma-1
O43852	CALU	Calumenin
O43895	XPNPEP2	Xaa-Pro aminopeptidase 2
O60229	KALRN	Kalirin
O60234	GMFG	Glia maturation factor gamma
O60279	SUSD5	Sushi domain-containing protein 5
O60462	NRP2	Neuropilin-2
O60496	DOK2	Docking protein 2
O60610	DIAPH1	Protein diaphanous homolog 1
O60664	PLIN3	Perilipin-3
O60667	FCMR	Fas apoptotic inhibitory molecule 3
O60844	ZG16	Zymogen granule membrane protein 16
O60888	CUTA	Protein CutA
O60925	PFDN1	Prefoldin subunit 1
O75116	ROCK2	Rho-associated protein kinase 2
O75223	GGCT	Gamma-glutamylcyclotransferase
O75323	NIPSNAP2	Protein NipSnap homolog 2
O75326	SEMA7A	Semaphorin-7A
O75347	TBCA	Tubulin-specific chaperone A
O75352	MPDU1	Mannose-P-dolichol utilization defect 1 protein
O75396	SEC22B	Vesicle-trafficking protein SEC22b
O75563	SKAP2	Src kinase-associated phosphoprotein 2
O75594	PGLYRP1	Peptidoglycan recognition protein 1
O75608	LYPLA1	Acyl-protein thioesterase 1
O75791	GRAP2	GRB2-related adapter protein 2
O75954	TSPAN9	Tetraspanin-9
O75955	FLOT1	Flotillin-1
O75964	ATP5MG	ATP synthase subunit g, mitochondrial
O94769	ECM2	Extracellular matrix protein 2
O94886	TMEM63A	CSC1-like protein 1
O94919	ENDOD1	Endonuclease domain-containing 1 protein
O94985	CLSTN1	Calsyntenin-1
O95084	PRSS23	Serine protease 23
O95336	PGLS	6-phosphogluconolactonase
O95428	PAPLN	Papilin
O95721	SNAP29	Synaptosomal-associated protein 29
O95782	AP2A1	AP-2 complex subunit alpha-1
O95870	ABHD16A	Phosphatidylserine lipase ABHD16A
O95881	TXNDC12	Thioredoxin domain-containing protein 12
O95897	OLFM2	Noelin-2
O95967	EFEMP2	EGF-containing fibulin-like extracellular matrix protein 2
O95980	RECK	Reversion-inducing cysteine-rich protein with Kazal motifs
O95998	IL18BP	Interleukin-18-binding protein
P00325	ADH1B	All-trans-retinol dehydrogenase [NAD(+)] ADH1B
P00326	ADH1C	Alcohol dehydrogenase 1C
P00352	ALDH1A1	Aldehyde dehydrogenase 1A1
P00367	GLUD1	Glutamate dehydrogenase 1, mitochondrial
P00451	F8	Coagulation factor VIII
P00568	AK1	Adenylate kinase isoenzyme 1
P00846	MT-ATP6	ATP synthase subunit a
P01130	LDLR	Low-density lipoprotein receptor
P02461	COL3A1	Collagen alpha-1(III) chain
P02549	SPTA1	Spectrin alpha chain, erythrocytic 1
P02724	GYPA	Glycophorin-A
P02741	CRP	C-reactive protein
P04080	CSTB	Cystatin-B
P04216	THY1	Thy-1 membrane glycoprotein
P04424	ASL	Argininosuccinate lyase
P04746	AMY2A	Pancreatic alpha-amylase
P04844	RPN2	Dolichyl-diphosphooligosaccharide--protein glycosyltransferase subunit 2
P05019	IGF1	Insulin-like growth factor I
P05026	ATP1B1	Sodium/potassium-transporting ATPase subunit beta-1
P05107	ITGB2	Integrin beta-2
P05121	SERPINE1	Plasminogen activator inhibitor 1
P05141	SLC25A5	ADP/ATP translocase 2
P05164	MPO	Myeloperoxidase
P05186	ALPL	Alkaline phosphatase, tissue-nonspecific isozyme
P05771	PRKCB	Protein kinase C beta type
P05976	MYL1	Myosin light chain 1/3, skeletal muscle isoform
P06703	S100A6	Protein S100-A6
P06858	LPL	Lipoprotein lipase
P06865	HEXA	Beta-hexosaminidase subunit alpha
P07307	ASGR2	Asialoglycoprotein receptor 2
P07451	CA3	Carbonic anhydrase 3
P07477	PRSS1	Serine protease 1
P07602	PSAP	Prosaposin
P07711	CTSL	Procathepsin L
P07738	BPGM	Bisphosphoglycerate mutase
P07741	APRT	Adenine phosphoribosyltransferase
P07948	LYN	Tyrosine-protein kinase Lyn
P07954	FH	Fumarate hydratase, mitochondrial
P08123	COL1A2	Collagen alpha-2(I) chain
P08174	CD55	Complement decay-accelerating factor
P08195	SLC3A2	Amino acid transporter heavy chain SLC3A2
P08319	ADH4	All-trans-retinol dehydrogenase [NAD(+)] ADH4
P08559	PDHA1	Pyruvate dehydrogenase E1 component subunit alpha, somatic form, mitochondrial
P08572	COL4A2	Collagen alpha-2(IV) chain
P08575	PTPRC	Receptor-type tyrosine-protein phosphatase C
P08581	MET	Hepatocyte growth factor receptor
P08648	ITGA5	Integrin alpha-5
P08833	IGFBP1	Insulin-like growth factor-binding protein 1
P09104	ENO2	Gamma-enolase
P09326	CD48	CD48 antigen
P09382	LGALS1	Galectin-1
P09417	QDPR	Dihydropteridine reductase
P09467	FBP1	Fructose-1,6-bisphosphatase 1
P09496	CLTA	Clathrin light chain A
P09497	CLTB	Clathrin light chain B
P09525	ANXA4	Annexin A4
P09603	CSF1	Macrophage colony-stimulating factor 1
P09619	PDGFRB	Platelet-derived growth factor receptor beta
P09668	CTSH	Pro-cathepsin H
P09960	LTA4H	Leukotriene A-4 hydrolase
P09972	ALDOC	Fructose-bisphosphate aldolase C
P0DJI9	SAA2	Serum amyloid A-2 protein
P0DMM9;P0DMN0	SULT1A3;SULT1A4	Sulfotransferase 1A3;Sulfotransferase 1A4
P0DP57	SLURP2	Secreted Ly-6/uPAR domain-containing protein 2
P0DTE7;P0DTE8;P0DUB6	AMY1B;AMY1C;AMY1A	Alpha-amylase 1B;Alpha-amylase 1C;Alpha-amylase 1A
P10301	RRAS	Ras-related protein R-Ras
P10451	SPP1	Osteopontin
P10619	CTSA	Lysosomal protective protein
P10644	PRKAR1A	cAMP-dependent protein kinase type I-alpha regulatory subunit
P10645	CHGA	Chromogranin-A
P10720	PF4V1	Platelet factor 4 variant
P10768	ESD	S-formylglutathione hydrolase
P10912	GHR	Growth hormone receptor
P11047	LAMC1	Laminin subunit gamma-1
P11166	SLC2A1	Solute carrier family 2, facilitated glucose transporter member 1
P11171	EPB41	Protein 4.1
P11177	PDHB	Pyruvate dehydrogenase E1 component subunit beta, mitochondrial
P11310	ACADM	Medium-chain specific acyl-CoA dehydrogenase, mitochondrial
P11586	MTHFD1	C-1-tetrahydrofolate synthase, cytoplasmic
P11684	SCGB1A1	Uteroglobin
P11766	ADH5	Alcohol dehydrogenase class-3
P12110	COL6A2	Collagen alpha-2(VI) chain
P12883	MYH7	Myosin-7
P12955	PEPD	Xaa-Pro dipeptidase
P13489	RNH1	Ribonuclease inhibitor
P13501	CCL5	C-C motif chemokine 5
P13611	VCAN	Versican core protein
P13693	TPT1	Translationally-controlled tumor protein
P13797	PLS3	Plastin-3
P13798	APEH	Acylamino-acid-releasing enzyme
P13804	ETFA	Electron transfer flavoprotein subunit alpha, mitochondrial
P13987	CD59	CD59 glycoprotein
P14174	MIF	Macrophage migration inhibitory factor
P14207	FOLR2	Folate receptor beta
P14317	HCLS1	Hematopoietic lineage cell-specific protein
P14384	CPM	Carboxypeptidase M
P14550	AKR1A1	Aldo-keto reductase family 1 member A1
P14780	MMP9	Matrix metalloproteinase-9
P14868	DARS1	Aspartate--tRNA ligase, cytoplasmic
P14923	JUP	Junction plakoglobin
P15289	ARSA	Arylsulfatase A
P16112	ACAN	Aggrecan core protein
P16152	CBR1	Carbonyl reductase [NADPH] 1
P16278	GLB1	Beta-galactosidase
P16452	EPB42	Protein 4.2
P16581	SELE	E-selectin
P17050	NAGA	Alpha-N-acetylgalactosaminidase
P17813	ENG	Endoglin
P17858	PFKL	ATP-dependent 6-phosphofructokinase, liver type
P17927	CR1	Complement receptor type 1
P17931	LGALS3	Galectin-3
P17980	PSMC3	26S proteasome regulatory subunit 6A
P17987	TCP1	T-complex protein 1 subunit alpha
P18850	ATF6	Cyclic AMP-dependent transcription factor ATF-6 alpha
P19021	PAM	Peptidyl-glycine alpha-amidating monooxygenase
P19022	CDH2	Cadherin-2
P19086	GNAZ	Guanine nucleotide-binding protein G(z) subunit alpha
P19256	CD58	Lymphocyte function-associated antigen 3
P19971	TYMP	Thymidine phosphorylase
P20023	CR2	Complement receptor type 2
P20073	ANXA7	Annexin A7
P20340	RAB6A	Ras-related protein Rab-6A
P20674	COX5A	Cytochrome c oxidase subunit 5A, mitochondrial
P20810	CAST	Calpastatin
P20827	EFNA1	Ephrin-A1
P21266	GSTM3	Glutathione S-transferase Mu 3
P21281	ATP6V1B2	V-type proton ATPase subunit B, brain isoform
P21399	ACO1	Cytoplasmic aconitate hydratase
P21583	KITLG	Kit ligand
P22307	SCP2	Sterol carrier protein 2
P22314	UBA1	Ubiquitin-like modifier-activating enzyme 1
P22695	UQCRC2	Cytochrome b-c1 complex subunit 2, mitochondrial
P23141	CES1	Liver carboxylesterase 1
P23219	PTGS1	Prostaglandin G/H synthase 1
P23368	ME2	NAD-dependent malic enzyme, mitochondrial
P23467	PTPRB	Receptor-type tyrosine-protein phosphatase beta
P23471	PTPRZ1	Receptor-type tyrosine-protein phosphatase zeta
P23526	AHCY	Adenosylhomocysteinase
P24043	LAMA2	Laminin subunit alpha-2
P24298	GPT	Alanine aminotransferase 1
P24387	CRHBP	Corticotropin-releasing factor-binding protein
P24534	EEF1B2	Elongation factor 1-beta
P24539	ATP5PB	ATP synthase F(0) complex subunit B1, mitochondrial
P24666	ACP1	Low molecular weight phosphotyrosine protein phosphatase
P25398	RPS12	Small ribosomal subunit protein eS12
P25774	CTSS	Cathepsin S
P25786	PSMA1	Proteasome subunit alpha type-1
P26572	MGAT1	Alpha-1,3-mannosyl-glycoprotein 2-beta-N-acetylglucosaminyltransferase
P26639	TARS1	Threonine--tRNA ligase 1, cytoplasmic
P26885	FKBP2	Peptidyl-prolyl cis-trans isomerase FKBP2
P26992	CNTFR	Ciliary neurotrophic factor receptor subunit alpha
P27338	MAOB	Amine oxidase [flavin-containing] B
P27701	CD82	CD82 antigen
P27930	IL1R2	Interleukin-1 receptor type 2
P28161	GSTM2	Glutathione S-transferase Mu 2
P28799	GRN	Progranulin
P28827	PTPRM	Receptor-type tyrosine-protein phosphatase mu
P28838	LAP3	Cytosol aminopeptidase
P28906	CD34	Hematopoietic progenitor cell antigen CD34
P29144	TPP2	Tripeptidyl-peptidase 2
P29279	CCN2	CCN family member 2
P29401	TKT	Transketolase
P29692	EEF1D	Elongation factor 1-delta
P30040	ERP29	Endoplasmic reticulum resident protein 29
P30046	DDT	D-dopachrome decarboxylase
P30049	ATP5F1D	ATP synthase subunit delta, mitochondrial
P30084	ECHS1	Enoyl-CoA hydratase, mitochondrial
P30085	CMPK1	UMP-CMP kinase
P30153	PPP2R1A	Serine/threonine-protein phosphatase 2A 65 kDa regulatory subunit A alpha isoform
P30273	FCER1G	High affinity immunoglobulin epsilon receptor subunit gamma
P30405	PPIF	Peptidyl-prolyl cis-trans isomerase F, mitochondrial
P30530	AXL	Tyrosine-protein kinase receptor UFO
P30566	ADSL	Adenylosuccinate lyase
P30626	SRI	Sorcin
P31930	UQCRC1	Cytochrome b-c1 complex subunit 1, mitochondrial
P31939	ATIC	Bifunctional purine biosynthesis protein ATIC
P32004	L1CAM	Neural cell adhesion molecule L1
P32321	DCTD	Deoxycytidylate deaminase
P32754	HPD	4-hydroxyphenylpyruvate dioxygenase
P34096	RNASE4	Ribonuclease 4
P34932	HSPA4	Heat shock 70 kDa protein 4
P35052	GPC1	Glypican-1
P35232	PHB1	Prohibitin 1
P35237	SERPINB6	Serpin B6
P35241	RDX	Radixin
P35247	SFTPD	Pulmonary surfactant-associated protein D
P35590	TIE1	Tyrosine-protein kinase receptor Tie-1
P35611	ADD1	Alpha-adducin
P35612	ADD2	Beta-adducin
P35613	BSG	Basigin
P35754	GLRX	Glutaredoxin-1
P35813	PPM1A	Protein phosphatase 1A
P35968	KDR	Vascular endothelial growth factor receptor 2
P36222	CHI3L1	Chitinase-3-like protein 1
P36269	GGT5	Glutathione hydrolase 5 proenzyme
P36542	ATP5F1C	ATP synthase subunit gamma, mitochondrial
P36543	ATP6V1E1	V-type proton ATPase subunit E 1
P36957	DLST	Dihydrolipoyllysine-residue succinyltransferase component of 2-oxoglutarate dehydrogenase complex, mitochondrial
P36959	GMPR	GMP reductase 1
P37235	HPCAL1	Hippocalcin-like protein 1
P38117	ETFB	Electron transfer flavoprotein subunit beta
P38606	ATP6V1A	V-type proton ATPase catalytic subunit A
P38646	HSPA9	Stress-70 protein, mitochondrial
P39059	COL15A1	Collagen alpha-1(XV) chain
P39656	DDOST	Dolichyl-diphosphooligosaccharide--protein glycosyltransferase 48 kDa subunit
P40227	CCT6A	T-complex protein 1 subunit zeta
P40939	HADHA	Trifunctional enzyme subunit alpha, mitochondrial
P41226	UBA7	Ubiquitin-like modifier-activating enzyme 7
P41240	CSK	Tyrosine-protein kinase CSK
P41271	NBL1	Neuroblastoma suppressor of tumorigenicity 1
P42768	WAS	Actin nucleation-promoting factor WAS
P42892	ECE1	Endothelin-converting enzyme 1
P43034	PAFAH1B1	Platelet-activating factor acetylhydrolase IB subunit beta
P43304	GPD2	Glycerol-3-phosphate dehydrogenase, mitochondrial
P43405	SYK	Tyrosine-protein kinase SYK
P43487	RANBP1	Ran-specific GTPase-activating protein
P45877	PPIC	Peptidyl-prolyl cis-trans isomerase C
P45974	USP5	Ubiquitin carboxyl-terminal hydrolase 5
P46459	NSF	Vesicle-fusing ATPase
P46531	NOTCH1	Neurogenic locus notch homolog protein 1
P46976	GYG1	Glycogenin-1
P48047	ATP5PO	ATP synthase subunit O, mitochondrial
P48061	CXCL12	Stromal cell-derived factor 1
P48163	ME1	NADP-dependent malic enzyme
P48426	PIP4K2A	Phosphatidylinositol 5-phosphate 4-kinase type-2 alpha
P48444	ARCN1	Coatomer subunit delta
P48509	CD151	CD151 antigen
P48643	CCT5	T-complex protein 1 subunit epsilon
P48723	HSPA13	Heat shock 70 kDa protein 13
P48960	ADGRE5	Adhesion G protein-coupled receptor E5
P49257	LMAN1	Protein ERGIC-53
P49327	FASN	Fatty acid synthase
P49407	ARRB1	Beta-arrestin-1
P49411	TUFM	Elongation factor Tu, mitochondrial
P49588	AARS1	Alanine--tRNA ligase, cytoplasmic
P49591	SARS1	Serine--tRNA ligase, cytoplasmic
P49641	MAN2A2	Alpha-mannosidase 2x
P49748	ACADVL	Very long-chain specific acyl-CoA dehydrogenase, mitochondrial
P49755	TMED10	Transmembrane emp24 domain-containing protein 10
P49773	HINT1	Adenosine 5'-monophosphoramidase HINT1
P50238	CRIP1	Cysteine-rich protein 1
P50402	EMD	Emerin
P50453	SERPINB9	Serpin B9
P50454	SERPINH1	Serpin H1
P50851	LRBA	Lipopolysaccharide-responsive and beige-like anchor protein
P50895	BCAM	Basal cell adhesion molecule
P50995	ANXA11	Annexin A11
P51148	RAB5C	Ras-related protein Rab-5C
P51452	DUSP3	Dual specificity protein phosphatase 3
P51572	BCAP31	B-cell receptor-associated protein 31
P51659	HSD17B4	Peroxisomal multifunctional enzyme type 2
P51693	APLP1	Amyloid beta precursor like protein 1
P53396	ACLY	ATP-citrate synthase
P53621	COPA	Coatomer subunit alpha
P53634	CTSC	Dipeptidyl peptidase 1
P53801	PTTG1IP	Pituitary tumor-transforming gene 1 protein-interacting protein
P54108	CRISP3	Cysteine-rich secretory protein 3
P54136	RARS1	Arginine--tRNA ligase, cytoplasmic
P54577	YARS1	Tyrosine--tRNA ligase, cytoplasmic
P54727	RAD23B	UV excision repair protein RAD23 homolog B
P54764	EPHA4	Ephrin type-A receptor 4
P54819	AK2	Adenylate kinase 2, mitochondrial
P54920	NAPA	Alpha-soluble NSF attachment protein
P55036	PSMD4	26S proteasome non-ATPase regulatory subunit 4
P55083	MFAP4	Microfibril-associated glycoprotein 4
P55084	HADHB	Trifunctional enzyme subunit beta, mitochondrial
P55145	MANF	Mesencephalic astrocyte-derived neurotrophic factor
P55268	LAMB2	Laminin subunit beta-2
P55285	CDH6	Cadherin-6
P55786	NPEPPS	Puromycin-sensitive aminopeptidase
P55809	OXCT1	Succinyl-CoA:3-ketoacid coenzyme A transferase 1, mitochondrial
P56134	ATP5MF	ATP synthase subunit f, mitochondrial
P58546	MTPN	Myotrophin
P60174	TPI1	Triosephosphate isomerase
P60842	EIF4A1	Eukaryotic initiation factor 4A-I
P60983	GMFB	Glia maturation factor beta
P60985	KRTDAP	Keratinocyte differentiation-associated protein
P61006	RAB8A	Ras-related protein Rab-8A
P61020	RAB5B	Ras-related protein Rab-5B
P61088	UBE2N	Ubiquitin-conjugating enzyme E2 N
P61106	RAB14	Ras-related protein Rab-14
P61163	ACTR1A	Alpha-centractin
P61224	RAP1B	Ras-related protein Rap-1b
P61225	RAP2B	Ras-related protein Rap-2b
P61604	HSPE1	10 kDa heat shock protein, mitochondrial
P61803	DAD1	Dolichyl-diphosphooligosaccharide--protein glycosyltransferase subunit DAD1
P61960	UFM1	Ubiquitin-fold modifier 1
P61978	HNRNPK	Heterogeneous nuclear ribonucleoprotein K
P62136	PPP1CA	Serine/threonine-protein phosphatase PP1-alpha catalytic subunit
P62195	PSMC5	26S proteasome regulatory subunit 8
P62873	GNB1	Guanine nucleotide-binding protein G(I)/G(S)/G(T) subunit beta-1
P62879	GNB2	Guanine nucleotide-binding protein G(I)/G(S)/G(T) subunit beta-2
P62942	FKBP1A	Peptidyl-prolyl cis-trans isomerase FKBP1A
P63167	DYNLL1	Dynein light chain 1, cytoplasmic
P63218	GNG5	Guanine nucleotide-binding protein G(I)/G(S)/G(O) subunit gamma-5
P63313	TMSB10	Thymosin beta-10
P68036	UBE2L3	Ubiquitin-conjugating enzyme E2 L3
P68104;Q5VTE0	EEF1A1;EEF1A1P5	Elongation factor 1-alpha 1;Putative elongation factor 1-alpha-like 3
P68400;Q8NEV1	CSNK2A1;CSNK2A3	Casein kinase II subunit alpha;Casein kinase II subunit alpha 3
P69849;Q15155;Q5JPE7	NOMO3;NOMO1;NOMO2	BOS complex subunit NOMO3;BOS complex subunit NOMO1;BOS complex subunit NOMO2
P78504	JAG1	Protein jagged-1
P78552	IL13RA1	Interleukin-13 receptor subunit alpha-1
P84095	RHOG	Rho-related GTP-binding protein RhoG
Q00013	MPP1	55 kDa erythrocyte membrane protein
Q00688	FKBP3	Peptidyl-prolyl cis-trans isomerase FKBP3
Q00796	SORD	Sorbitol dehydrogenase
Q01082	SPTBN1	Spectrin beta chain, non-erythrocytic 1
Q01469	FABP5	Fatty acid-binding protein 5
Q01813	PFKP	ATP-dependent 6-phosphofructokinase, platelet type
Q02094	RHAG	Ammonium transporter Rh type A
Q02487	DSC2	Desmocollin-2
Q02818	NUCB1	Nucleobindin-1
Q02978	SLC25A11	Mitochondrial 2-oxoglutarate/malate carrier protein
Q02985	CFHR3	Complement factor H-related protein 3
Q03154	ACY1	Aminoacylase-1
Q04721	NOTCH2	Neurogenic locus notch homolog protein 2
Q04941	PLP2	Proteolipid protein 2
Q05209	PTPN12	Tyrosine-protein phosphatase non-receptor type 12
Q05397	PTK2	Focal adhesion kinase 1
Q05655	PRKCD	Protein kinase C delta type
Q06187	BTK	Tyrosine-protein kinase BTK
Q06481	APLP2	Amyloid beta precursor like protein 2
Q07021	C1QBP	Complement component 1 Q subcomponent-binding protein, mitochondrial
Q07075	ENPEP	Glutamyl aminopeptidase
Q08257	CRYZ	Quinone oxidoreductase
Q08554	DSC1	Desmocollin-1
Q10471	GALNT2	Polypeptide N-acetylgalactosaminyltransferase 2
Q10588	BST1	ADP-ribosyl cyclase/cyclic ADP-ribose hydrolase 2
Q12866	MERTK	Tyrosine-protein kinase Mer
Q12884	FAP	Prolyl endopeptidase FAP
Q13011	ECH1	Delta(3,5)-Delta(2,4)-dienoyl-CoA isomerase, mitochondrial
Q13045	FLII	Protein flightless-1 homolog
Q13093	PLA2G7	Platelet-activating factor acetylhydrolase
Q13094	LCP2	Lymphocyte cytosolic protein 2
Q13162	PRDX4	Peroxiredoxin-4
Q13217	DNAJC3	DnaJ homolog subfamily C member 3
Q13228	SELENBP1	Methanethiol oxidase
Q13308	PTK7	Inactive tyrosine-protein kinase 7
Q13332	PTPRS	Receptor-type tyrosine-protein phosphatase S
Q13421	MSLN	Mesothelin
Q13423	NNT	NAD(P) transhydrogenase, mitochondrial
Q13442	PDAP1	28 kDa heat- and acid-stable phosphoprotein
Q13449	LSAMP	Limbic system-associated membrane protein
Q13477	MADCAM1	Mucosal addressin cell adhesion molecule 1
Q13508	ART3	Ecto-ADP-ribosyltransferase 3
Q13526	PIN1	Peptidyl-prolyl cis-trans isomerase NIMA-interacting 1
Q13561	DCTN2	Dynactin subunit 2
Q13637	RAB32	Ras-related protein Rab-32
Q13813	SPTAN1	Spectrin alpha chain, non-erythrocytic 1
Q13884	SNTB1	Beta-1-syntrophin
Q14008	CKAP5	Cytoskeleton-associated protein 5
Q14012	CAMK1	Calcium/calmodulin-dependent protein kinase type 1
Q14141	SEPTIN6	Septin-6
Q14165	MLEC	Malectin
Q14204	DYNC1H1	Cytoplasmic dynein 1 heavy chain 1
Q14254	FLOT2	Flotillin-2
Q14314	FGL2	Fibroleukin
Q14315	FLNC	Filamin-C
Q14554	PDIA5	Protein disulfide-isomerase A5
Q14574	DSC3	Desmocollin-3
Q14623	IHH	Indian hedgehog protein
Q14644	RASA3	Ras GTPase-activating protein 3
Q14677	CLINT1	Clathrin interactor 1
Q14696	MESD	LRP chaperone MESD
Q14767	LTBP2	Latent-transforming growth factor beta-binding protein 2
Q14956	GPNMB	Transmembrane glycoprotein NMB
Q14974	KPNB1	Importin subunit beta-1
Q15185	PTGES3	Prostaglandin E synthase 3
Q15223	NECTIN1	Nectin-1
Q15262	PTPRK	Receptor-type tyrosine-protein phosphatase kappa
Q15366	PCBP2	Poly(rC)-binding protein 2
Q15465	SHH	Sonic hedgehog protein
Q15628	TRADD	Tumor necrosis factor receptor type 1-associated DEATH domain protein
Q15746	MYLK	Myosin light chain kinase, smooth muscle
Q15762	CD226	CD226 antigen
Q15843	NEDD8	NEDD8
Q15904	ATP6AP1	V-type proton ATPase subunit S1
Q16531	DDB1	DNA damage-binding protein 1
Q16543	CDC37	Hsp90 co-chaperone Cdc37
Q16555	DPYSL2	Dihydropyrimidinase-related protein 2
Q16627	CCL14	C-C motif chemokine 14
Q16663	CCL15	C-C motif chemokine 15
Q16698	DECR1	2,4-dienoyl-CoA reductase [(3E)-enoyl-CoA-producing], mitochondrial
Q16762	TST	Thiosulfate sulfurtransferase
Q16775	HAGH	Hydroxyacylglutathione hydrolase, mitochondrial
Q16836	HADH	Hydroxyacyl-coenzyme A dehydrogenase, mitochondrial
Q16881	TXNRD1	Thioredoxin reductase 1, cytoplasmic
Q32MZ4	LRRFIP1	Leucine-rich repeat flightless-interacting protein 1
Q3LXA3	TKFC	Triokinase/FMN cyclase
Q4G0F5	VPS26B	Vacuolar protein sorting-associated protein 26B
Q4KMQ2	ANO6	Anoctamin-6
Q5JSH3	WDR44	WD repeat-containing protein 44
Q5SZK8	FREM2	FRAS1-related extracellular matrix protein 2
Q5T013	HYI	Putative hydroxypyruvate isomerase
Q5T5C0	STXBP5	Syntaxin-binding protein 5
Q5T749	KPRP	Keratinocyte proline-rich protein
Q5VY43	PEAR1	Platelet endothelial aggregation receptor 1
Q6DD88	ATL3	Atlastin-3
Q6E0U4	DMKN	Dermokine
Q6FHJ7	SFRP4	Secreted frizzled-related protein 4
Q6GTS8	PM20D1	N-fatty-acyl-amino acid synthase/hydrolase PM20D1
Q6IBS0	TWF2	Twinfilin-2
Q6PJW8	CNST	Consortin
Q6XQN6	NAPRT	Nicotinate phosphoribosyltransferase
Q7KZF4	SND1	Staphylococcal nuclease domain-containing protein 1
Q7L591	DOK3	Docking protein 3
Q7L9L4;Q9H8S9	MOB1B;MOB1A	MOB kinase activator 1B;MOB kinase activator 1A
Q7LDG7	RASGRP2	RAS guanyl-releasing protein 2
Q7Z3B1	NEGR1	Neuronal growth regulator 1
Q86VP6	CAND1	Cullin-associated NEDD8-dissociated protein 1
Q86WI1	PKHD1L1	Fibrocystin-L
Q86X29	LSR	Lipolysis-stimulated lipoprotein receptor
Q86YZ3	HRNR	Hornerin
Q8IUG5	MYO18B	Unconventional myosin-XVIIIb
Q8IUK5	PLXDC1	Plexin domain-containing protein 1
Q8IUL8	CILP2	Cartilage intermediate layer protein 2
Q8IVW4	CDKL3	Cyclin-dependent kinase-like 3
Q8IWA5	SLC44A2	Choline transporter-like protein 2
Q8IWL1;Q8IWL2	SFTPA2;SFTPA1	Pulmonary surfactant-associated protein A2;Pulmonary surfactant-associated protein A1
Q8IYS5	OSCAR	Osteoclast-associated immunoglobulin-like receptor
Q8IZ83	ALDH16A1	Aldehyde dehydrogenase family 16 member A1
Q8IZP0	ABI1	Abl interactor 1
Q8IZP9	ADGRG2	Adhesion G-protein coupled receptor G2
Q8N149	LILRA2	Leukocyte immunoglobulin-like receptor subfamily A member 2
Q8N392	ARHGAP18	Rho GTPase-activating protein 18
Q8N699	MYCT1	Myc target protein 1
Q8N6C8	LILRA3	Leukocyte immunoglobulin-like receptor subfamily A member 3
Q8N8Z6	DCBLD1	Discoidin, CUB and LCCL domain-containing protein 1
Q8NBF2	NHLRC2	NHL repeat-containing protein 2
Q8NBJ4	GOLM1	Golgi membrane protein 1
Q8NBM8	PCYOX1L	Prenylcysteine oxidase-like
Q8NBS9	TXNDC5	Thioredoxin domain-containing protein 5
Q8NDA2	HMCN2	Hemicentin-2
Q8NE86	MCU	Calcium uniporter protein, mitochondrial
Q8NEU8	APPL2	DCC-interacting protein 13-beta
Q8NFV4	ABHD11	Protein ABHD11
Q8NG11	TSPAN14	Tetraspanin-14
Q8TDQ0	HAVCR2	Hepatitis A virus cellular receptor 2
Q8TDY8	IGDCC4	Immunoglobulin superfamily DCC subclass member 4
Q8TEA8	DTD1	D-aminoacyl-tRNA deacylase 1
Q8WUM4	PDCD6IP	Programmed cell death 6-interacting protein
Q8WVN6	SECTM1	Secreted and transmembrane protein 1
Q8WWA1	TMEM40	Transmembrane protein 40
Q8WZ75	ROBO4	Roundabout homolog 4
Q8WZA0	LZIC	Protein LZIC
Q92520	FAM3C	Protein FAM3C
Q92859	NEO1	Neogenin
Q92876	KLK6	Kallikrein-6
Q92882	OSTF1	Osteoclast-stimulating factor 1
Q93063	EXT2	Exostosin-2
Q969H8	MYDGF	Myeloid-derived growth factor
Q96A00	PPP1R14A	Protein phosphatase 1 regulatory subunit 14A
Q96AG4	LRRC59	Leucine-rich repeat-containing protein 59
Q96AP7	ESAM	Endothelial cell-selective adhesion molecule
Q96B86	RGMA	Repulsive guidance molecule A
Q96BZ4	PLD4	5'-3' exonuclease PLD4
Q96C24	SYTL4	Synaptotagmin-like protein 4
Q96DZ9	CMTM5	CKLF-like MARVEL transmembrane domain-containing protein 5
Q96FJ2	DYNLL2	Dynein light chain 2, cytoplasmic
Q96FW1	OTUB1	Ubiquitin thioesterase OTUB1
Q96G03	PGM2	Phosphopentomutase
Q96HC4	PDLIM5	PDZ and LIM domain protein 5
Q96HD1	CRELD1	Protein disulfide isomerase CRELD1
Q96IU4	ABHD14B	Putative protein-lysine deacylase ABHD14B
Q96J42	TXNDC15	Thioredoxin domain-containing protein 15
Q96JA1	LRIG1	Leucine-rich repeats and immunoglobulin-like domains protein 1
Q96KG7	MEGF10	Multiple epidermal growth factor-like domains protein 10
Q96NZ9	PRAP1	Proline-rich acidic protein 1
Q96P48	ARAP1	Arf-GAP with Rho-GAP domain, ANK repeat and PH domain-containing protein 1
Q96QK1	VPS35	Vacuolar protein sorting-associated protein 35
Q96RI0	F2RL3	Proteinase-activated receptor 4
Q96RT1	ERBIN	Erbin
Q99623	PHB2	Prohibitin-2
Q99719	SEPTIN5	Septin-5
Q99733	NAP1L4	Nucleosome assembly protein 1-like 4
Q99798	ACO2	Aconitate hydratase, mitochondrial
Q99805	TM9SF2	Transmembrane 9 superfamily member 2
Q99832	CCT7	T-complex protein 1 subunit eta
Q99941	ATF6B	Cyclic AMP-dependent transcription factor ATF-6 beta
Q99952	PTPN18	Tyrosine-protein phosphatase non-receptor type 18
Q99983	OMD	Osteomodulin
Q9BPX5	ARPC5L	Actin-related protein 2/3 complex subunit 5-like protein
Q9BQ51	PDCD1LG2	Programmed cell death 1 ligand 2
Q9BR76	CORO1B	Coronin-1B
Q9BRA2	TXNDC17	Thioredoxin domain-containing protein 17
Q9BRP8	PYM1	Partner of Y14 and mago
Q9BSJ8	ESYT1	Extended synaptotagmin-1
Q9BT23	LIMD2	LIM domain-containing protein 2
Q9BUL8	PDCD10	Programmed cell death protein 10
Q9BV40	VAMP8	Vesicle-associated membrane protein 8
Q9BVC6	TMEM109	Voltage-gated monoatomic cation channel TMEM109
Q9BWD1	ACAT2	Acetyl-CoA acetyltransferase, cytosolic
Q9BWV1	BOC	Brother of CDO
Q9BX68	HINT2	Adenosine 5'-monophosphoramidase HINT2
Q9BY67	CADM1	Cell adhesion molecule 1
Q9BYJ0	FGFBP2	Fibroblast growth factor-binding protein 2
Q9C0C9	UBE2O	(E3-independent) E2 ubiquitin-conjugating enzyme
Q9GZT8	NIF3L1	NIF3-like protein 1
Q9H0P0	NT5C3A	Cytosolic 5'-nucleotidase 3A
Q9H0R4	HDHD2	Haloacid dehalogenase-like hydrolase domain-containing protein 2
Q9H1U4	MEGF9	Multiple epidermal growth factor-like domains protein 9
Q9H2K8	TAOK3	Serine/threonine-protein kinase TAO3
Q9H2U2	PPA2	Inorganic pyrophosphatase 2, mitochondrial
Q9H479	FN3K	Fructosamine-3-kinase
Q9H4M9	EHD1	EH domain-containing protein 1
Q9H4X1	RGCC	Regulator of cell cycle RGCC
Q9H6X2	ANTXR1	Anthrax toxin receptor 1
Q9H8J5	MANSC1	MANSC domain-containing protein 1
Q9H939	PSTPIP2	Proline-serine-threonine phosphatase-interacting protein 2
Q9HAV0	GNB4	Guanine nucleotide-binding protein subunit beta-4
Q9HBB8	CDHR5	Cadherin-related family member 5
Q9HBR0	SLC38A10	Solute carrier family 38 member 10
Q9HBW9	ADGRL4	Adhesion G protein-coupled receptor L4
Q9HC38	GLOD4	Glyoxalase domain-containing protein 4
Q9HCB6	SPON1	Spondin-1
Q9HCL0	PCDH18	Protocadherin-18
Q9HCN6	GP6	Platelet glycoprotein VI
Q9NP72	RAB18	Ras-related protein Rab-18
Q9NP79	VTA1	Vacuolar protein sorting-associated protein VTA1 homolog
Q9NQ75	CASS4	Cas scaffolding protein family member 4
Q9NQS3	NECTIN3	Nectin-3
Q9NQW7	XPNPEP1	Xaa-Pro aminopeptidase 1
Q9NR28	DIABLO	Diablo IAP-binding mitochondrial protein
Q9NR31	SAR1A	GTP-binding protein SAR1a
Q9NRW1	RAB6B	Ras-related protein Rab-6B
Q9NS28	RGS18	Regulator of G-protein signaling 18
Q9NSC7	ST6GALNAC1	Alpha-N-acetylgalactosaminide alpha-2,6-sialyltransferase 1
Q9NT22	EMILIN3	EMILIN-3
Q9NTK5	OLA1	Obg-like ATPase 1
Q9NTU7	CBLN4	Cerebellin-4
Q9NVA2	SEPTIN11	Septin-11
Q9NWV4	CZIB	CXXC motif containing zinc binding protein
Q9NX76	CMTM6	CKLF-like MARVEL transmembrane domain-containing protein 6
Q9NXH8	TOR4A	Torsin-4A
Q9NY15	STAB1	Stabilin-1
Q9NY33	DPP3	Dipeptidyl peptidase 3
Q9NY97	B3GNT2	N-acetyllactosaminide beta-1,3-N-acetylglucosaminyltransferase 2
Q9NYU2	UGGT1	UDP-glucose:glycoprotein glucosyltransferase 1
Q9P0L0	VAPA	Vesicle-associated membrane protein-associated protein A
Q9P121	NTM	Neurotrimin
Q9P126	CLEC1B	C-type lectin domain family 1 member B
Q9P232	CNTN3	Contactin-3
Q9P2X0	DPM3	Dolichol-phosphate mannosyltransferase subunit 3
Q9UBB4	ATXN10	Ataxin-10
Q9UBC2	EPS15L1	Epidermal growth factor receptor substrate 15-like 1
Q9UBG0	MRC2	C-type mannose receptor 2
Q9UBP4	DKK3	Dickkopf-related protein 3
Q9UBQ7	GRHPR	Glyoxylate reductase/hydroxypyruvate reductase
Q9UBR2	CTSZ	Cathepsin Z
Q9UBX1	CTSF	Cathepsin F
Q9UDW1	UQCR10	Cytochrome b-c1 complex subunit 9
Q9UDY2	TJP2	Tight junction protein ZO-2
Q9UEW3	MARCO	Macrophage receptor MARCO
Q9UHD8	SEPTIN9	Septin-9
Q9UHV9	PFDN2	Prefoldin subunit 2
Q9UIJ7	AK3	GTP:AMP phosphotransferase AK3, mitochondrial
Q9UIW2	PLXNA1	Plexin-A1
Q9UJ68	MSRA	Mitochondrial peptide methionine sulfoxide reductase
Q9UJC5	SH3BGRL2	SH3 domain-binding glutamic acid-rich-like protein 2
Q9UKU6	TRHDE	Thyrotropin-releasing hormone-degrading ectoenzyme
Q9UKY7	CDV3	Protein CDV3 homolog
Q9UL25	RAB21	Ras-related protein Rab-21
Q9UL46	PSME2	Proteasome activator complex subunit 2
Q9UM47	NOTCH3	Neurogenic locus notch homolog protein 3
Q9UMX5	NENF	Neudesin
Q9UNF0	PACSIN2	Protein kinase C and casein kinase substrate in neurons protein 2
Q9UNZ2	NSFL1C	NSFL1 cofactor p47
Q9UQ80	PA2G4	Proliferation-associated protein 2G4
Q9UQP3	TNN	Tenascin-N
Q9Y274	ST3GAL6	Type 2 lactosamine alpha-2,3-sialyltransferase
Q9Y279	VSIG4	V-set and immunoglobulin domain-containing protein 4
Q9Y2C3	B3GALT5	Beta-1,3-galactosyltransferase 5
Q9Y2G1	MYRF	Myelin regulatory factor
Q9Y2Q3	GSTK1	Glutathione S-transferase kappa 1
Q9Y2Q5	LAMTOR2	Ragulator complex protein LAMTOR2
Q9Y2S2	CRYL1	Lambda-crystallin homolog
Q9Y2Z0	SUGT1	Protein SGT1 homolog
Q9Y315	DERA	Deoxyribose-phosphate aldolase
Q9Y3F4	STRAP	Serine-threonine kinase receptor-associated protein
Q9Y4D7	PLXND1	Plexin-D1
Q9Y4G8	RAPGEF2	Rap guanine nucleotide exchange factor 2
Q9Y5K6	CD2AP	CD2-associated protein
Q9Y608	LRRFIP2	Leucine-rich repeat flightless-interacting protein 2
Q9Y613	FHOD1	FH1/FH2 domain-containing protein 1
Q9Y696	CLIC4	Chloride intracellular channel protein 4

## Sheet: S.Table 3 unique CSF nondep
Accession	Description	Gene.Symbol
P0DOX5	Immunoglobulin gamma-1 heavy chain [OS=Homo sapiens]
P04259	Keratin, type II cytoskeletal 6B [OS=Homo sapiens]	KRT6B
P19013	Keratin, type II cytoskeletal 4 [OS=Homo sapiens]	KRT4
P13646	Keratin, type I cytoskeletal 13 [OS=Homo sapiens]	KRT13
Q01546	Keratin, type II cytoskeletal 2 oral [OS=Homo sapiens]	KRT76
Q9HDB5	Neurexin-3-beta [OS=Homo sapiens]	NRXN3
P0DOX8	Immunoglobulin lambda-1 light chain [OS=Homo sapiens]
Q5XKE5	Keratin, type II cytoskeletal 79 [OS=Homo sapiens]	KRT79
P0DOX3	Immunoglobulin delta heavy chain [OS=Homo sapiens]
A0M8Q6	Immunoglobulin lambda constant 7 [OS=Homo sapiens]	IGLC7
P0DOX2	Immunoglobulin alpha-2 heavy chain [OS=Homo sapiens]
Q02413	Desmoglein-1 [OS=Homo sapiens]	DSG1
Q6KB66	Keratin, type II cytoskeletal 80 [OS=Homo sapiens]	KRT80
P01721	Immunoglobulin lambda variable 6-57 [OS=Homo sapiens]	IGLV6-57
Q5D862	Filaggrin-2 [OS=Homo sapiens]	FLG2
P22735	Protein-glutamine gamma-glutamyltransferase K [OS=Homo sapiens]	TGM1
Q9NSB2	Keratin, type II cuticular Hb4 [OS=Homo sapiens]	KRT84
P01597	Immunoglobulin kappa variable 1-39 [OS=Homo sapiens]	IGKV1-39
P01701	Immunoglobulin lambda variable 1-51 [OS=Homo sapiens]	IGLV1-51
A0A087WSY6	Immunoglobulin kappa variable 3D-15 [OS=Homo sapiens]	IGKV3D-15
A0A0B4J1Y9	Immunoglobulin heavy variable 3-72 [OS=Homo sapiens]	IGHV3-72
Q9UBG3	Cornulin [OS=Homo sapiens]	CRNN
A0A0B4J1Y8	Immunoglobulin lambda variable 9-49 [OS=Homo sapiens]	IGLV9-49
Q8WVV4	Protein POF1B [OS=Homo sapiens]	POF1B
P01768	Immunoglobulin heavy variable 3-30 [OS=Homo sapiens]	IGHV3-30
A0A075B6I0	Immunoglobulin lambda variable 8-61 [OS=Homo sapiens]	IGLV8-61
A0A0J9YX35	Immunoglobulin heavy variable 3-64D [OS=Homo sapiens]	IGHV3-64D
P80748	Immunoglobulin lambda variable 3-21 [OS=Homo sapiens]	IGLV3-21
A0A075B6K4	Immunoglobulin lambda variable 3-10 [OS=Homo sapiens]	IGLV3-10
P01742	Immunoglobulin heavy variable 1-69 [OS=Homo sapiens]	IGHV1-69
P22532	Small proline-rich protein 2D [OS=Homo sapiens]	SPRR2D
A0A1B0GUS4	Ubiquitin-conjugating enzyme E2 L5 [OS=Homo sapiens]	UBE2L5
P08246	Neutrophil elastase [OS=Homo sapiens]	ELANE
P01700	Immunoglobulin lambda variable 1-47 [OS=Homo sapiens]	IGLV1-47
Q9HAV0	Guanine nucleotide-binding protein subunit beta-4 [OS=Homo sapiens]	GNB4
A0A0B4J1U3	Immunoglobulin lambda variable 1-36 [OS=Homo sapiens]	IGLV1-36
A0A087WW87	Immunoglobulin kappa variable 2-40 [OS=Homo sapiens]	IGKV2-40
A0A0C4DH24	Immunoglobulin kappa variable 6-21 [OS=Homo sapiens]	IGKV6-21
Q5T749	Keratinocyte proline-rich protein [OS=Homo sapiens]	KPRP
A0A0C4DH26	Probable non-functional immunoglobulin kappa variable 6D-41 [OS=Homo sapiens]	IGKV6D-41
A0A0C4DH35	Probable non-functional immunoglobulin heavy variable 3-35 [OS=Homo sapiens]	IGHV3-35
P0DP57	Secreted Ly-6/uPAR domain-containing protein 2 [OS=Homo sapiens]	SLURP2
A0A0C4DH32	Immunoglobulin heavy variable 3-20 [OS=Homo sapiens]	IGHV3-20
Q14533	Keratin, type II cuticular Hb1 [OS=Homo sapiens]	KRT81
P01766	Immunoglobulin heavy variable 3-13 [OS=Homo sapiens]	IGHV3-13
P29508	Serpin B3 [OS=Homo sapiens]	SERPINB3
A8MTJ3	Guanine nucleotide-binding protein G(t) subunit alpha-3 [OS=Homo sapiens]	GNAT3
P05783	Keratin, type I cytoskeletal 18 [OS=Homo sapiens]	KRT18
A0A075B6J1	Immunoglobulin lambda variable 5-37 [OS=Homo sapiens]	IGLV5-37
P05387	60S acidic ribosomal protein P2 [OS=Homo sapiens]	RPLP2
A0A075B6K0	Immunoglobulin lambda variable 3-16 [OS=Homo sapiens]	IGLV3-16
A0A075B6S5	Immunoglobulin kappa variable 1-27 [OS=Homo sapiens]	IGKV1-27
P01036	Cystatin-S [OS=Homo sapiens]	CST4
P01718	Immunoglobulin lambda variable 3-27 [OS=Homo sapiens]	IGLV3-27
A0A0J9YXX1	Immunoglobulin heavy variable 5-10-1 [OS=Homo sapiens]	IGHV5-10-1
A0A075B6H9	Immunoglobulin lambda variable 4-69 [OS=Homo sapiens]	IGLV4-69
P23083	Immunoglobulin heavy variable 1-2 [OS=Homo sapiens]	IGHV1-2
P0DP04	Immunoglobulin heavy variable 3-43D [OS=Homo sapiens]	IGHV3-43D
P23490	Loricrin [OS=Homo sapiens]	LORICRIN
P55854	Small ubiquitin-related modifier 3 [OS=Homo sapiens]	SUMO3
P07951	Tropomyosin beta chain [OS=Homo sapiens]	TPM2
O75342	Arachidonate 12-lipoxygenase, 12R-type [OS=Homo sapiens]	ALOX12B
Q9Y5F8	Protocadherin gamma-B7 [OS=Homo sapiens]	PCDHGB7
A0A0B4J1X8	Immunoglobulin heavy variable 3-43 [OS=Homo sapiens]	IGHV3-43
A0A0C4DH36	Probable non-functional immunoglobulin heavy variable 3-38 [OS=Homo sapiens]	IGHV3-38
Q8IZP2	Putative protein FAM10A4 [OS=Homo sapiens]	ST13P4
Q5JXB2	Putative ubiquitin-conjugating enzyme E2 N-like [OS=Homo sapiens]	UBE2NL
P01714	Immunoglobulin lambda variable 3-19 [OS=Homo sapiens]	IGLV3-19
Q9NRX4	14 kDa phosphohistidine phosphatase [OS=Homo sapiens]	PHPT1
P80297	Metallothionein-1X [OS=Homo sapiens]	MT1X
P16402	Histone H1.3 [OS=Homo sapiens]	H1-3
O75019	Leukocyte immunoglobulin-like receptor subfamily A member 1 [OS=Homo sapiens]	LILRA1
Q5T6V5	Queuosine salvage protein [OS=Homo sapiens]	QNG1
Q13835	Plakophilin-1 [OS=Homo sapiens]	PKP1
Q9NP55	BPI fold-containing family A member 1 [OS=Homo sapiens]	BPIFA1
P20618	Proteasome subunit beta type-1 [OS=Homo sapiens]	PSMB1
A0A0C4DH34	Immunoglobulin heavy variable 4-28 [OS=Homo sapiens]	IGHV4-28
P20382	Pro-MCH [OS=Homo sapiens]	PMCH
A0A0C4DH43	Immunoglobulin heavy variable 2-70D [OS=Homo sapiens]	IGHV2-70D
A0A0G2JS06	Immunoglobulin lambda variable 5-39 [OS=Homo sapiens]	IGLV5-39
Q9Y5G1	Protocadherin gamma-B3 [OS=Homo sapiens]	PCDHGB3
Q9BS40	Latexin [OS=Homo sapiens]	LXN
Q08397	Lysyl oxidase homolog 1 [OS=Homo sapiens]	LOXL1
O60812	Heterogeneous nuclear ribonucleoprotein C-like 1 [OS=Homo sapiens]	HNRNPCL1
Q86UB9	Transmembrane protein 135 [OS=Homo sapiens]	TMEM135
P0DP09	Immunoglobulin kappa variable 1-13 [OS=Homo sapiens]	IGKV1-13
Q9HC84	Mucin-5B [OS=Homo sapiens]	MUC5B
Q9NP84	Tumor necrosis factor receptor superfamily member 12A [OS=Homo sapiens]	TNFRSF12A
O14792	Heparan sulfate glucosamine 3-O-sulfotransferase 1 [OS=Homo sapiens]	HS3ST1
A0A075B6I4	Immunoglobulin lambda variable 10-54 [OS=Homo sapiens]	IGLV10-54
P24530	Endothelin receptor type B [OS=Homo sapiens]	EDNRB
Q8IZV5	Retinol dehydrogenase 10 [OS=Homo sapiens]	RDH10
A0A0B4J1V2	Immunoglobulin heavy variable 2-26 [OS=Homo sapiens]	IGHV2-26
P02511	Alpha-crystallin B chain [OS=Homo sapiens]	CRYAB
Q99798	Aconitate hydratase, mitochondrial [OS=Homo sapiens]	ACO2
P49221	Protein-glutamine gamma-glutamyltransferase 4 [OS=Homo sapiens]	TGM4
B4DS77	Protein shisa-9 [OS=Homo sapiens]	SHISA9
P48546	Gastric inhibitory polypeptide receptor [OS=Homo sapiens]	GIPR
O00244	Copper transport protein ATOX1 [OS=Homo sapiens]	ATOX1
P0DSN7	Probable non-functional immunoglobulinn kappa variable 1D-37 [OS=Homo sapiens]	IGKV1D-37
Q9UBE0	SUMO-activating enzyme subunit 1 [OS=Homo sapiens]	SAE1
Q8IZM9	Probable sodium-coupled neutral amino acid transporter 6 [OS=Homo sapiens]	SLC38A6
Q9UL62	Short transient receptor potential channel 5 [OS=Homo sapiens]	TRPC5
P11171	Protein 4.1 [OS=Homo sapiens]	EPB41
Q86XJ1	GAS2-like protein 3 [OS=Homo sapiens]	GAS2L3
A6NFK2	Glutaredoxin domain-containing cysteine-rich protein 2 [OS=Homo sapiens]	GRXCR2
Q9NVE5	Ubiquitin carboxyl-terminal hydrolase 40 [OS=Homo sapiens]	USP40
Q96DR8	Mucin-like protein 1 [OS=Homo sapiens]	MUCL1
P01814	Immunoglobulin heavy variable 2-70 [OS=Homo sapiens]	IGHV2-70
Q9NZV5	Selenoprotein N [OS=Homo sapiens]	SELENON
Q9HCS7	Pre-mRNA-splicing factor SYF1 [OS=Homo sapiens]	XAB2
Q8NF91	Nesprin-1 [OS=Homo sapiens]	SYNE1
Q86UP2	Kinectin [OS=Homo sapiens]	KTN1
P62633	CCHC-type zinc finger nucleic acid binding protein [OS=Homo sapiens]	CNBP
P07477	Serine protease 1 [OS=Homo sapiens]	PRSS1
O43526	Potassium voltage-gated channel subfamily KQT member 2 [OS=Homo sapiens]	KCNQ2
Q92994	Transcription factor IIIB 90 kDa subunit [OS=Homo sapiens]	BRF1
Q5VST9	Obscurin [OS=Homo sapiens]	OBSCN
Q8WWY7	WAP four-disulfide core domain protein 12 [OS=Homo sapiens]	WFDC12
Q92623	Tetratricopeptide repeat protein 9A [OS=Homo sapiens]	TTC9
P29034	Protein S100-A2 [OS=Homo sapiens]	S100A2
Q8WUW1	Protein BRICK1 [OS=Homo sapiens]	BRK1
Q9UL16	Cilia- and flagella-associated protein 45 [OS=Homo sapiens]	CFAP45
A0A087WSY4	Immunoglobulin heavy variable 4-30-2 [OS=Homo sapiens]	IGHV4-30-2
Q8WZ42	Titin [OS=Homo sapiens]	TTN
P40967	Melanocyte protein PMEL [OS=Homo sapiens]	PMEL
Q9C093	Sperm flagellar protein 2 [OS=Homo sapiens]	SPEF2
P45381	Aspartoacylase [OS=Homo sapiens]	ASPA
Q13569	G/T mismatch-specific thymine DNA glycosylase [OS=Homo sapiens]	TDG
Q8NB25	Protein FAM184A [OS=Homo sapiens]	FAM184A
Q8NCN4	E3 ubiquitin-protein ligase RNF169 [OS=Homo sapiens]	RNF169
Q9BZH6	WD repeat-containing protein 11 [OS=Homo sapiens]	WDR11
Q8TF72	Protein Shroom3 [OS=Homo sapiens]	SHROOM3
Q9H0E9	Bromodomain-containing protein 8 [OS=Homo sapiens]	BRD8
P20290	Transcription factor BTF3 [OS=Homo sapiens]	BTF3
A0A0B4J1V7	Probable non-functional immunoglobulin heavy variable 7-81 [OS=Homo sapiens]	IGHV7-81
P49419	Alpha-aminoadipic semialdehyde dehydrogenase [OS=Homo sapiens]	ALDH7A1
Q66K66	Transmembrane protein 198 [OS=Homo sapiens]	TMEM198
Q92616	eIF-2-alpha kinase activator GCN1 [OS=Homo sapiens]	GCN1
A4D1E1	Zinc finger protein 804B [OS=Homo sapiens]	ZNF804B
Q96IF1	LIM domain-containing protein ajuba [OS=Homo sapiens]	AJUBA
P78563	Double-stranded RNA-specific editase 1 [OS=Homo sapiens]	ADARB1
A0A075B6I1	Immunoglobulin lambda variable 4-60 [OS=Homo sapiens]	IGLV4-60
Q9H3S7	Tyrosine-protein phosphatase non-receptor type 23 [OS=Homo sapiens]	PTPN23
P13535	Myosin-8 [OS=Homo sapiens]	MYH8
Q8IWX7	Protein unc-45 homolog B [OS=Homo sapiens]	UNC45B
Q8IUH2	Protein CREG2 [OS=Homo sapiens]	CREG2
Q56P03	E2F-associated phosphoprotein [OS=Homo sapiens]	EAPP
Q14247	Src substrate cortactin [OS=Homo sapiens]	CTTN
Q96ST3	Paired amphipathic helix protein Sin3a [OS=Homo sapiens]	SIN3A
Q8NDI1	EH domain-binding protein 1 [OS=Homo sapiens]	EHBP1
P01817	Immunoglobulin heavy variable 2-5 [OS=Homo sapiens]	IGHV2-5
Q9NVC6	Mediator of RNA polymerase II transcription subunit 17 [OS=Homo sapiens]	MED17
Q00532	Cyclin-dependent kinase-like 1 [OS=Homo sapiens]
Q13017	Rho GTPase-activating protein 5 [OS=Homo sapiens]	ARHGAP5
P14555	Phospholipase A2, membrane associated [OS=Homo sapiens]	PLA2G2A
Q8IWZ3	Ankyrin repeat and KH domain-containing protein 1 [OS=Homo sapiens]	ANKHD1
Q8N4Q0	Prostaglandin reductase 3 [OS=Homo sapiens]	PTGR3
Q15697	Zinc finger protein 174 [OS=Homo sapiens]	ZNF174
P22234	Bifunctional phosphoribosylaminoimidazole carboxylase/phosphoribosylaminoimidazole succinocarboxamide synthetase [OS=Homo sapiens]	PAICS
Q8N1H7	Protein SIX6OS1 [OS=Homo sapiens]	SIX6OS1
Q9P0U3	Sentrin-specific protease 1 [OS=Homo sapiens]	SENP1
Q6NXR0	Interferon-inducible GTPase 5 [OS=Homo sapiens]	IRGC
Q969N2	GPI transamidase component PIG-T [OS=Homo sapiens]	PIGT
Q4G0N8	Sodium/hydrogen exchanger 10 [OS=Homo sapiens]	SLC9C1

## Sheet: S.Table4 unique CSF dep
Accession	Description	Gene.Symbol
Q96RW7	Hemicentin-1 [OS=Homo sapiens]	HMCN1
Q14517	Protocadherin Fat 1 [OS=Homo sapiens]	FAT1
P08582	Melanotransferrin [OS=Homo sapiens]	MELTF
P58400	Neurexin-1-beta [OS=Homo sapiens]	NRXN1
Q5TFQ8	Signal-regulatory protein beta-1 isoform 3 [OS=Homo sapiens]	SIRPB1
Q16881	Thioredoxin reductase 1, cytoplasmic [OS=Homo sapiens]	TXNRD1
Q5JPE7	Nodal modulator 2 [OS=Homo sapiens]	NOMO2
P35241	Radixin [OS=Homo sapiens]	RDX
P54652	Heat shock-related 70 kDa protein 2 [OS=Homo sapiens]	HSPA2
O75051	Plexin-A2 [OS=Homo sapiens]	PLXNA2
O75077	Disintegrin and metalloproteinase domain-containing protein 23 [OS=Homo sapiens]	ADAM23
P63010	AP-2 complex subunit beta [OS=Homo sapiens]	AP2B1
P27487	Dipeptidyl peptidase 4 [OS=Homo sapiens]	DPP4
P01857	Immunoglobulin heavy constant gamma 1 [OS=Homo sapiens]
P10745	Retinol-binding protein 3 [OS=Homo sapiens]	RBP3
Q04917	14-3-3 protein eta [OS=Homo sapiens]	YWHAH
P08238	Heat shock protein HSP 90-beta [OS=Homo sapiens]	HSP90AB1
P63267	Actin, gamma-enteric smooth muscle [OS=Homo sapiens]	ACTG2
Q14315	Filamin-C [OS=Homo sapiens]	FLNC
P19961	Alpha-amylase 2B [OS=Homo sapiens]	AMY2B
P04746	Pancreatic alpha-amylase [OS=Homo sapiens]	AMY2A
O60476	Mannosyl-oligosaccharide 1,2-alpha-mannosidase IB [OS=Homo sapiens]	MAN1A2
Q63HQ2	Pikachurin [OS=Homo sapiens]	EGFLAM
P22314	Ubiquitin-like modifier-activating enzyme 1 [OS=Homo sapiens]	UBA1
Q13444	Disintegrin and metalloproteinase domain-containing protein 15 [OS=Homo sapiens]	ADAM15
P58401	Neurexin-2-beta [OS=Homo sapiens]	NRXN2
Q5JZY3	Ephrin type-A receptor 10 [OS=Homo sapiens]	EPHA10
Q9NZV1	Cysteine-rich motor neuron 1 protein [OS=Homo sapiens]	CRIM1
P28838	Cytosol aminopeptidase [OS=Homo sapiens]	LAP3
O60449	Lymphocyte antigen 75 [OS=Homo sapiens]	LY75
Q8TAB3	Protocadherin-19 [OS=Homo sapiens]	PCDH19
Q9H3S3	Transmembrane protease serine 5 [OS=Homo sapiens]	TMPRSS5
P08581	Hepatocyte growth factor receptor [OS=Homo sapiens]	MET
P00739	Haptoglobin-related protein [OS=Homo sapiens]	HPR
Q9Y5G0	Protocadherin gamma-B5 [OS=Homo sapiens]	PCDHGB5
Q03405	Urokinase plasminogen activator surface receptor [OS=Homo sapiens]	PLAUR
Q96MU8	Kremen protein 1 [OS=Homo sapiens]	KREMEN1
P46821	Microtubule-associated protein 1B [OS=Homo sapiens]	MAP1B
Q9UKZ4	Teneurin-1 [OS=Homo sapiens]	TENM1
P10644	cAMP-dependent protein kinase type I-alpha regulatory subunit [OS=Homo sapiens]	PRKAR1A
O43909	Exostosin-like 3 [OS=Homo sapiens]	EXTL3
P56817	Beta-secretase 1 [OS=Homo sapiens]	BACE1
O75487	Glypican-4 [OS=Homo sapiens]	GPC4
O94779	Contactin-5 [OS=Homo sapiens]	CNTN5
O95497	Pantetheinase [OS=Homo sapiens]	VNN1
P36888	Receptor-type tyrosine-protein kinase FLT3 [OS=Homo sapiens]	FLT3
P35916	Vascular endothelial growth factor receptor 3 [OS=Homo sapiens]	FLT4
Q8WUM4	Programmed cell death 6-interacting protein [OS=Homo sapiens]	PDCD6IP
Q12884	Prolyl endopeptidase FAP [OS=Homo sapiens]	FAP
P10915	Hyaluronan and proteoglycan link protein 1 [OS=Homo sapiens]	HAPLN1
P10321	HLA class I histocompatibility antigen, C alpha chain [OS=Homo sapiens]	HLA-C
P48147	Prolyl endopeptidase [OS=Homo sapiens]	PREP
O95490	Adhesion G protein-coupled receptor L2 [OS=Homo sapiens]	ADGRL2
O95841	Angiopoietin-related protein 1 [OS=Homo sapiens]	ANGPTL1
P58215	Lysyl oxidase homolog 3 [OS=Homo sapiens]	LOXL3
Q96PZ7	CUB and sushi domain-containing protein 1 [OS=Homo sapiens]	CSMD1
P15328	Folate receptor alpha [OS=Homo sapiens]	FOLR1
Q9UPZ6	Thrombospondin type-1 domain-containing protein 7A [OS=Homo sapiens]	THSD7A
Q9UIQ6	Leucyl-cystinyl aminopeptidase [OS=Homo sapiens]	LNPEP
P27930	Interleukin-1 receptor type 2 [OS=Homo sapiens]	IL1R2
P12036	Neurofilament heavy polypeptide [OS=Homo sapiens]	NEFH
Q92832	Protein kinase C-binding protein NELL1 [OS=Homo sapiens]	NELL1
P34932	Heat shock 70 kDa protein 4 [OS=Homo sapiens]	HSPA4
Q5VV63	Attractin-like protein 1 [OS=Homo sapiens]	ATRNL1
P07359	Platelet glycoprotein Ib alpha chain [OS=Homo sapiens]	GP1BA
P13637	Sodium/potassium-transporting ATPase subunit alpha-3 [OS=Homo sapiens]	ATP1A3
P15848	Arylsulfatase B [OS=Homo sapiens]	ARSB
P23229	Integrin alpha-6 [OS=Homo sapiens]	ITGA6
Q92729	Receptor-type tyrosine-protein phosphatase U [OS=Homo sapiens]	PTPRU
Q9UI15	Transgelin-3 [OS=Homo sapiens]	TAGLN3
O94933	SLIT and NTRK-like protein 3 [OS=Homo sapiens]	SLITRK3
Q16531	DNA damage-binding protein 1 [OS=Homo sapiens]	DDB1
P67936	Tropomyosin alpha-4 chain [OS=Homo sapiens]	TPM4
P23467	Receptor-type tyrosine-protein phosphatase beta [OS=Homo sapiens]	PTPRB
Q9NZU0	Leucine-rich repeat transmembrane protein FLRT3 [OS=Homo sapiens]	FLRT3
Q9Y490	Talin-1 [OS=Homo sapiens]	TLN1
P54753	Ephrin type-B receptor 3 [OS=Homo sapiens]	EPHB3
P14780	Matrix metalloproteinase-9 [OS=Homo sapiens]	MMP9
Q86YD3	Transmembrane protein 25 [OS=Homo sapiens]	TMEM25
Q9BZ76	Contactin-associated protein-like 3 [OS=Homo sapiens]	CNTNAP3
Q15303	Receptor tyrosine-protein kinase erbB-4 [OS=Homo sapiens]	ERBB4
O75129	Astrotactin-2 [OS=Homo sapiens]	ASTN2
O00560	Syntenin-1 [OS=Homo sapiens]	SDCBP
Q99584	Protein S100-A13 [OS=Homo sapiens]	S100A13
Q9Y376	Calcium-binding protein 39 [OS=Homo sapiens]	CAB39
Q86TE4	Leucine zipper protein 2 [OS=Homo sapiens]	LUZP2
Q02985	Complement factor H-related protein 3 [OS=Homo sapiens]	CFHR3
B9A064	Immunoglobulin lambda-like polypeptide 5 [OS=Homo sapiens]	IGLL5
Q9NS15	Latent-transforming growth factor beta-binding protein 3 [OS=Homo sapiens]	LTBP3
P01236	Prolactin [OS=Homo sapiens]	PRL
Q9Y4D7	Plexin-D1 [OS=Homo sapiens]	PLXND1
Q9UBV2	Protein sel-1 homolog 1 [OS=Homo sapiens]	SEL1L
Q86SQ4	Adhesion G-protein coupled receptor G6 [OS=Homo sapiens]	ADGRG6
Q96PD2	Discoidin, CUB and LCCL domain-containing protein 2 [OS=Homo sapiens]	DCBLD2
Q15166	Serum paraoxonase/lactonase 3 [OS=Homo sapiens]	PON3
O75096	Low-density lipoprotein receptor-related protein 4 [OS=Homo sapiens]	LRP4
Q16832	Discoidin domain-containing receptor 2 [OS=Homo sapiens]	DDR2
P68036	Ubiquitin-conjugating enzyme E2 L3 [OS=Homo sapiens]	UBE2L3
Q86XS8	E3 ubiquitin-protein ligase RNF130 [OS=Homo sapiens]	RNF130
P78423	Fractalkine [OS=Homo sapiens]	CX3CL1
P20810	Calpastatin [OS=Homo sapiens]	CAST
O60486	Plexin-C1 [OS=Homo sapiens]	PLXNC1
P01037	Cystatin-SN [OS=Homo sapiens]	CST1
Q9ULL4	Plexin-B3 [OS=Homo sapiens]	PLXNB3
Q96MK3	Pseudokinase FAM20A [OS=Homo sapiens]	FAM20A
O75094	Slit homolog 3 protein [OS=Homo sapiens]	SLIT3
P0DJI9	Serum amyloid A-2 protein [OS=Homo sapiens]	SAA2
P28066	Proteasome subunit alpha type-5 [OS=Homo sapiens]	PSMA5
Q8NBJ7	Inactive C-alpha-formylglycine-generating enzyme 2 [OS=Homo sapiens]	SUMF2
Q9H0E2	Toll-interacting protein [OS=Homo sapiens]	TOLLIP
P08887	Interleukin-6 receptor subunit alpha [OS=Homo sapiens]	IL6R
P35968	Vascular endothelial growth factor receptor 2 [OS=Homo sapiens]	KDR
P62136	Serine/threonine-protein phosphatase PP1-alpha catalytic subunit [OS=Homo sapiens]	PPP1CA
Q9Y5W5	Wnt inhibitory factor 1 [OS=Homo sapiens]	WIF1
Q9H3S1	Semaphorin-4A [OS=Homo sapiens]	SEMA4A
Q8N8Z6	Discoidin, CUB and LCCL domain-containing protein 1 [OS=Homo sapiens]	DCBLD1
Q7Z5L3	Complement C1q-like protein 2 [OS=Homo sapiens]	C1QL2
Q15149	Plectin [OS=Homo sapiens]	PLEC
Q9BRF8	Serine/threonine-protein phosphatase CPPED1 [OS=Homo sapiens]	CPPED1
P08709	Coagulation factor VII [OS=Homo sapiens]	F7
Q9NNW7	Thioredoxin reductase 2, mitochondrial [OS=Homo sapiens]	TXNRD2
P04085	Platelet-derived growth factor subunit A [OS=Homo sapiens]	PDGFA
P00491	Purine nucleoside phosphorylase [OS=Homo sapiens]	PNP
Q9Y5E8	Protocadherin beta-15 [OS=Homo sapiens]	PCDHB15
Q14914	Prostaglandin reductase 1 [OS=Homo sapiens]	PTGR1
Q8TDW7	Protocadherin Fat 3 [OS=Homo sapiens]	FAT3
P55289	Cadherin-12 [OS=Homo sapiens]	CDH12
Q8IYS5	Osteoclast-associated immunoglobulin-like receptor [OS=Homo sapiens]	OSCAR
O94973	AP-2 complex subunit alpha-2 [OS=Homo sapiens]	AP2A2
O00264	Membrane-associated progesterone receptor component 1 [OS=Homo sapiens]	PGRMC1
Q9BXJ3	Complement C1q tumor necrosis factor-related protein 4 [OS=Homo sapiens]	C1QTNF4
Q6V0I7	Protocadherin Fat 4 [OS=Homo sapiens]	FAT4
O00241	Signal-regulatory protein beta-1 [OS=Homo sapiens]	SIRPB1
P17050	Alpha-N-acetylgalactosaminidase [OS=Homo sapiens]	NAGA
Q658N2	WSC domain-containing protein 1 [OS=Homo sapiens]	WSCD1
Q9H1B5	Xylosyltransferase 2 [OS=Homo sapiens]	XYLT2
Q9ULH4	Leucine-rich repeat and fibronectin type-III domain-containing protein 2 [OS=Homo sapiens]	LRFN2
Q96TC7	Regulator of microtubule dynamics protein 3 [OS=Homo sapiens]	RMDN3
Q9H159	Cadherin-19 [OS=Homo sapiens]	CDH19
Q16787	Laminin subunit alpha-3 [OS=Homo sapiens]	LAMA3
Q16143	Beta-synuclein [OS=Homo sapiens]	SNCB
P14324	Farnesyl pyrophosphate synthase [OS=Homo sapiens]	FDPS
Q9NQS3	Nectin-3 [OS=Homo sapiens]	NECTIN3
Q9UK23	N-acetylglucosamine-1-phosphodiester alpha-N-acetylglucosaminidase [OS=Homo sapiens]	NAGPA
Q01973	Inactive tyrosine-protein kinase transmembrane receptor ROR1 [OS=Homo sapiens]	ROR1
O60565	Gremlin-1 [OS=Homo sapiens]	GREM1
P31321	cAMP-dependent protein kinase type I-beta regulatory subunit [OS=Homo sapiens]	PRKAR1B
Q9Y625	Glypican-6 [OS=Homo sapiens]	GPC6
P35754	Glutaredoxin-1 [OS=Homo sapiens]	GLRX
P04899	Guanine nucleotide-binding protein G(i) subunit alpha-2 [OS=Homo sapiens]	GNAI2
Q8WX77	Insulin-like growth factor-binding protein-like 1 [OS=Homo sapiens]	IGFBPL1
P09622	Dihydrolipoyl dehydrogenase, mitochondrial [OS=Homo sapiens]	DLD
P62879	Guanine nucleotide-binding protein G(I)/G(S)/G(T) subunit beta-2 [OS=Homo sapiens]	GNB2
O60469	Down syndrome cell adhesion molecule [OS=Homo sapiens]	DSCAM
Q15121	Astrocytic phosphoprotein PEA-15 [OS=Homo sapiens]	PEA15
P31431	Syndecan-4 [OS=Homo sapiens]	SDC4
P05997	Collagen alpha-2(V) chain [OS=Homo sapiens]	COL5A2
P21266	Glutathione S-transferase Mu 3 [OS=Homo sapiens]	GSTM3
P22392	Nucleoside diphosphate kinase B [OS=Homo sapiens]	NME2
Q86Y82	Syntaxin-12 [OS=Homo sapiens]	STX12
P13693	Translationally-controlled tumor protein [OS=Homo sapiens]	TPT1
P50502	Hsc70-interacting protein [OS=Homo sapiens]	ST13
Q9Y5G9	Protocadherin gamma-A4 [OS=Homo sapiens]	PCDHGA4
P16284	Platelet endothelial cell adhesion molecule [OS=Homo sapiens]	PECAM1
P17813	Endoglin [OS=Homo sapiens]	ENG
P10412	Histone H1.4 [OS=Homo sapiens]	H1-4
Q86UW8	Hyaluronan and proteoglycan link protein 4 [OS=Homo sapiens]	HAPLN4
P08236	Beta-glucuronidase [OS=Homo sapiens]	GUSB
Q9UF33	Ephrin type-A receptor 6 [OS=Homo sapiens]	EPHA6
Q9NZ94	Neuroligin-3 [OS=Homo sapiens]	NLGN3
Q06141	Regenerating islet-derived protein 3-alpha [OS=Homo sapiens]	REG3A
Q96JA1	Leucine-rich repeats and immunoglobulin-like domains protein 1 [OS=Homo sapiens]	LRIG1
Q9UN67	Protocadherin beta-10 [OS=Homo sapiens]	PCDHB10
P25940	Collagen alpha-3(V) chain [OS=Homo sapiens]	COL5A3
P13716	Delta-aminolevulinic acid dehydratase [OS=Homo sapiens]	ALAD
P09543	2',3'-cyclic-nucleotide 3'-phosphodiesterase [OS=Homo sapiens]	CNP
P46109	Crk-like protein [OS=Homo sapiens]	CRKL
P22223	Cadherin-3 [OS=Homo sapiens]	CDH3
Q9NR99	Matrix-remodeling-associated protein 5 [OS=Homo sapiens]	MXRA5
O43707	Alpha-actinin-4 [OS=Homo sapiens]	ACTN4
Q96NY7	Chloride intracellular channel protein 6 [OS=Homo sapiens]	CLIC6
Q8NCW6	Polypeptide N-acetylgalactosaminyltransferase 11 [OS=Homo sapiens]	GALNT11
P42892	Endothelin-converting enzyme 1 [OS=Homo sapiens]	ECE1
Q8N0V5	N-acetyllactosaminide beta-1,6-N-acetylglucosaminyl-transferase [OS=Homo sapiens]	GCNT2
Q9BY76	Angiopoietin-related protein 4 [OS=Homo sapiens]	ANGPTL4
O14668	Transmembrane gamma-carboxyglutamic acid protein 1 [OS=Homo sapiens]	PRRG1
Q96SM3	Probable carboxypeptidase X1 [OS=Homo sapiens]	CPXM1
Q5H8C1	FRAS1-related extracellular matrix protein 1 [OS=Homo sapiens]	FREM1
P01877	Immunoglobulin heavy constant alpha 2 [OS=Homo sapiens]
P62820	Ras-related protein Rab-1A [OS=Homo sapiens]	RAB1A
Q9H9S4	Calcium-binding protein 39-like [OS=Homo sapiens]	CAB39L
Q496H8	Neuritin-like protein [OS=Homo sapiens]	NRN1L
Q9Y227	Ectonucleoside triphosphate diphosphohydrolase 4 [OS=Homo sapiens]	ENTPD4
P01185	Vasopressin-neurophysin 2-copeptin [OS=Homo sapiens]	AVP
Q6UWU2	Beta-galactosidase-1-like protein [OS=Homo sapiens]	GLB1L
Q9NYU2	UDP-glucose:glycoprotein glucosyltransferase 1 [OS=Homo sapiens]	UGGT1
P78333	Glypican-5 [OS=Homo sapiens]	GPC5
Q9NR71	Neutral ceramidase [OS=Homo sapiens]	ASAH2
Q8NC96	Adaptin ear-binding coat-associated protein 1 [OS=Homo sapiens]	NECAP1
Q9UHD9	Ubiquilin-2 [OS=Homo sapiens]	UBQLN2
P54826	Growth arrest-specific protein 1 [OS=Homo sapiens]	GAS1
Q9H461	Frizzled-8 [OS=Homo sapiens]	FZD8
Q13093	Platelet-activating factor acetylhydrolase [OS=Homo sapiens]	PLA2G7
Q96FW1	Ubiquitin thioesterase OTUB1 [OS=Homo sapiens]	OTUB1
O43854	EGF-like repeat and discoidin I-like domain-containing protein 3 [OS=Homo sapiens]	EDIL3
Q76LX8	A disintegrin and metalloproteinase with thrombospondin motifs 13 [OS=Homo sapiens]	ADAMTS13
Q00973	Beta-1,4 N-acetylgalactosaminyltransferase 1 [OS=Homo sapiens]	B4GALNT1
Q9NRB3	Carbohydrate sulfotransferase 12 [OS=Homo sapiens]	CHST12
P54760	Ephrin type-B receptor 4 [OS=Homo sapiens]	EPHB4
O95156	Neurexophilin-2 [OS=Homo sapiens]	NXPH2
Q9Y275	Tumor necrosis factor ligand superfamily member 13B [OS=Homo sapiens]	TNFSF13B
Q99542	Matrix metalloproteinase-19 [OS=Homo sapiens]	MMP19
O15540	Fatty acid-binding protein, brain [OS=Homo sapiens]	FABP7
P24855	Deoxyribonuclease-1 [OS=Homo sapiens]	DNASE1
Q99075	Proheparin-binding EGF-like growth factor [OS=Homo sapiens]	HBEGF
O95782	AP-2 complex subunit alpha-1 [OS=Homo sapiens]	AP2A1
Q9NPA0	ER membrane protein complex subunit 7 [OS=Homo sapiens]	EMC7
Q9NQ76	Matrix extracellular phosphoglycoprotein [OS=Homo sapiens]	MEPE
P55011	Solute carrier family 12 member 2 [OS=Homo sapiens]	SLC12A2
Q16352	Alpha-internexin [OS=Homo sapiens]	INA
O94923	D-glucuronyl C5-epimerase [OS=Homo sapiens]	GLCE
Q9UNZ2	NSFL1 cofactor p47 [OS=Homo sapiens]	NSFL1C
P46940	Ras GTPase-activating-like protein IQGAP1 [OS=Homo sapiens]	IQGAP1
Q96DZ1	Endoplasmic reticulum lectin 1 [OS=Homo sapiens]	ERLEC1
P09525	Annexin A4 [OS=Homo sapiens]	ANXA4
P35475	Alpha-L-iduronidase [OS=Homo sapiens]	IDUA
Q9BXJ1	Complement C1q tumor necrosis factor-related protein 1 [OS=Homo sapiens]	C1QTNF1
P17405	Sphingomyelin phosphodiesterase [OS=Homo sapiens]	SMPD1
P10646	Tissue factor pathway inhibitor [OS=Homo sapiens]	TFPI
Q96MM7	Heparan-sulfate 6-O-sulfotransferase 2 [OS=Homo sapiens]	HS6ST2
P21554	Cannabinoid receptor 1 [OS=Homo sapiens]	CNR1
Q9NQ30	Endothelial cell-specific molecule 1 [OS=Homo sapiens]	ESM1
Q9UF11	Pleckstrin homology domain-containing family B member 1 [OS=Homo sapiens]	PLEKHB1
Q9NYX4	Neuron-specific vesicular protein calcyon [OS=Homo sapiens]	CALY
Q9Y6C2	EMILIN-1 [OS=Homo sapiens]	EMILIN1
Q6IBS0	Twinfilin-2 [OS=Homo sapiens]	TWF2
Q96IU4	Putative protein-lysine deacylase ABHD14B [OS=Homo sapiens]	ABHD14B
O43424	Glutamate receptor ionotropic, delta-2 [OS=Homo sapiens]	GRID2
P50995	Annexin A11 [OS=Homo sapiens]	ANXA11
P23588	Eukaryotic translation initiation factor 4B [OS=Homo sapiens]	EIF4B
P27816	Microtubule-associated protein 4 [OS=Homo sapiens]	MAP4
Q9Y5F9	Protocadherin gamma-B6 [OS=Homo sapiens]	PCDHGB6
Q7Z408	CUB and sushi domain-containing protein 2 [OS=Homo sapiens]	CSMD2
Q5BIV9	Shadow of prion protein [OS=Homo sapiens]	SPRN
Q15746	Myosin light chain kinase, smooth muscle [OS=Homo sapiens]	MYLK
Q8N474	Secreted frizzled-related protein 1 [OS=Homo sapiens]	SFRP1
P18085	ADP-ribosylation factor 4 [OS=Homo sapiens]	ARF4
Q96EU7	C1GALT1-specific chaperone 1 [OS=Homo sapiens]	C1GALT1C1
Q96QU1	Protocadherin-15 [OS=Homo sapiens]	PCDH15
Q13219	Pappalysin-1 [OS=Homo sapiens]	PAPPA
A2RU67	Protein FAM234B [OS=Homo sapiens]	FAM234B
P07196	Neurofilament light polypeptide [OS=Homo sapiens]	NEFL
Q9NQ36	Signal peptide, CUB and EGF-like domain-containing protein 2 [OS=Homo sapiens]	SCUBE2
Q9GZV7	Hyaluronan and proteoglycan link protein 2 [OS=Homo sapiens]	HAPLN2
Q6UXH1	Protein disulfide isomerase CRELD2 [OS=Homo sapiens]	CRELD2
Q8N2G4	Ly6/PLAUR domain-containing protein 1 [OS=Homo sapiens]	LYPD1
P61960	Ubiquitin-fold modifier 1 [OS=Homo sapiens]	UFM1
O95164	Ubiquitin-like protein 3 [OS=Homo sapiens]	UBL3
Q01814	Plasma membrane calcium-transporting ATPase 2 [OS=Homo sapiens]	ATP2B2
P25787	Proteasome subunit alpha type-2 [OS=Homo sapiens]	PSMA2
P48304	Lithostathine-1-beta [OS=Homo sapiens]	REG1B
Q8IZ52	Chondroitin sulfate synthase 2 [OS=Homo sapiens]	CHPF
O60234	Glia maturation factor gamma [OS=Homo sapiens]	GMFG
Q8WVN6	Secreted and transmembrane protein 1 [OS=Homo sapiens]	SECTM1
Q76KP1	N-acetyl-beta-glucosaminyl-glycoprotein 4-beta-N-acetylgalactosaminyltransferase 1 [OS=Homo sapiens]	B4GALNT4
P61026	Ras-related protein Rab-10 [OS=Homo sapiens]	RAB10
Q9UJQ1	Lysosome-associated membrane glycoprotein 5 [OS=Homo sapiens]	LAMP5
P16234	Platelet-derived growth factor receptor alpha [OS=Homo sapiens]	PDGFRA
P04440	HLA class II histocompatibility antigen, DP beta 1 chain [OS=Homo sapiens]	HLA-DPB1
O00469	Procollagen-lysine,2-oxoglutarate 5-dioxygenase 2 [OS=Homo sapiens]	PLOD2
Q96DG6	Carboxymethylenebutenolidase homolog [OS=Homo sapiens]	CMBL
Q9HCL0	Protocadherin-18 [OS=Homo sapiens]	PCDH18
Q9P273	Teneurin-3 [OS=Homo sapiens]	TENM3
Q9Y5H0	Protocadherin gamma-A3 [OS=Homo sapiens]	PCDHGA3
O75581	Low-density lipoprotein receptor-related protein 6 [OS=Homo sapiens]	LRP6
Q8IWK6	Adhesion G protein-coupled receptor A3 [OS=Homo sapiens]	ADGRA3
Q7L266	Isoaspartyl peptidase/L-asparaginase [OS=Homo sapiens]	ASRGL1
P11166	Solute carrier family 2, facilitated glucose transporter member 1 [OS=Homo sapiens]	SLC2A1
Q9NY56	Odorant-binding protein 2a [OS=Homo sapiens]	OBP2A
O43491	Band 4.1-like protein 2 [OS=Homo sapiens]	EPB41L2
Q9HCJ2	Leucine-rich repeat-containing protein 4C [OS=Homo sapiens]	LRRC4C
Q5T013	Putative hydroxypyruvate isomerase [OS=Homo sapiens]	HYI
Q9HBB8	Cadherin-related family member 5 [OS=Homo sapiens]	CDHR5
Q96HC4	PDZ and LIM domain protein 5 [OS=Homo sapiens]	PDLIM5
P35219	Carbonic anhydrase-related protein [OS=Homo sapiens]	CA8
Q9UI42	Carboxypeptidase A4 [OS=Homo sapiens]	CPA4
P49184	Deoxyribonuclease-1-like 1 [OS=Homo sapiens]	DNASE1L1
P09455	Retinol-binding protein 1 [OS=Homo sapiens]	RBP1
P61970	Nuclear transport factor 2 [OS=Homo sapiens]	NUTF2
Q15459	Splicing factor 3A subunit 1 [OS=Homo sapiens]	SF3A1
Q14847	LIM and SH3 domain protein 1 [OS=Homo sapiens]	LASP1
Q32P28	Prolyl 3-hydroxylase 1 [OS=Homo sapiens]	P3H1
P13747	HLA class I histocompatibility antigen, alpha chain E [OS=Homo sapiens]	HLA-E
Q9P2W7	Galactosylgalactosylxylosylprotein 3-beta-glucuronosyltransferase 1 [OS=Homo sapiens]	B3GAT1
Q8N6C8	Leukocyte immunoglobulin-like receptor subfamily A member 3 [OS=Homo sapiens]	LILRA3
O60939	Sodium channel subunit beta-2 [OS=Homo sapiens]	SCN2B
P06881	Calcitonin gene-related peptide 1 [OS=Homo sapiens]	CALCA
Q8N145	Leucine-rich repeat LGI family member 3 [OS=Homo sapiens]	LGI3
O15075	Serine/threonine-protein kinase DCLK1 [OS=Homo sapiens]	DCLK1
Q9Y2B0	Protein canopy homolog 2 [OS=Homo sapiens]	CNPY2
O75074	Low-density lipoprotein receptor-related protein 3 [OS=Homo sapiens]	LRP3
Q9NS68	Tumor necrosis factor receptor superfamily member 19 [OS=Homo sapiens]	TNFRSF19
Q9UL51	Potassium/sodium hyperpolarization-activated cyclic nucleotide-gated channel 2 [OS=Homo sapiens]	HCN2
Q99757	Thioredoxin, mitochondrial [OS=Homo sapiens]	TXN2
Q9Y5C1	Angiopoietin-related protein 3 [OS=Homo sapiens]	ANGPTL3
Q86VP6	Cullin-associated NEDD8-dissociated protein 1 [OS=Homo sapiens]	CAND1
Q8IZF2	Adhesion G protein-coupled receptor F5 [OS=Homo sapiens]	ADGRF5
Q32P51	Heterogeneous nuclear ribonucleoprotein A1-like 2 [OS=Homo sapiens]	HNRNPA1L2
Q99436	Proteasome subunit beta type-7 [OS=Homo sapiens]	PSMB7
Q8N3D4	EH domain-binding protein 1-like protein 1 [OS=Homo sapiens]	EHBP1L1
P63241	Eukaryotic translation initiation factor 5A-1 [OS=Homo sapiens]	EIF5A
P20700	Lamin-B1 [OS=Homo sapiens]	LMNB1
Q9NTN9	Semaphorin-4G [OS=Homo sapiens]	SEMA4G
P02792	Ferritin light chain [OS=Homo sapiens]	FTL
Q8WUA8	Tsukushi [OS=Homo sapiens]	TSKU
O14960	Leukocyte cell-derived chemotaxin-2 [OS=Homo sapiens]	LECT2
Q8IZU9	Kin of IRRE-like protein 3 [OS=Homo sapiens]	KIRREL3
P15085	Carboxypeptidase A1 [OS=Homo sapiens]	CPA1
P30046	D-dopachrome decarboxylase [OS=Homo sapiens]	DDT
O60844	Zymogen granule membrane protein 16 [OS=Homo sapiens]	ZG16
P25445	Tumor necrosis factor receptor superfamily member 6 [OS=Homo sapiens]	FAS
O43915	Vascular endothelial growth factor D [OS=Homo sapiens]	VEGFD
P00750	Tissue-type plasminogen activator [OS=Homo sapiens]	PLAT
P08473	Neprilysin [OS=Homo sapiens]	MME
P54819	Adenylate kinase 2, mitochondrial [OS=Homo sapiens]	AK2
O95433	Activator of 90 kDa heat shock protein ATPase homolog 1 [OS=Homo sapiens]	AHSA1
P31689	DnaJ homolog subfamily A member 1 [OS=Homo sapiens]	DNAJA1
P49746	Thrombospondin-3 [OS=Homo sapiens]	THBS3
P49588	Alanine--tRNA ligase, cytoplasmic [OS=Homo sapiens]	AARS1
O75095	Multiple epidermal growth factor-like domains protein 6 [OS=Homo sapiens]	MEGF6
Q8TAL6	Fin bud initiation factor homolog [OS=Homo sapiens]	FIBIN
O94903	Pyridoxal phosphate homeostasis protein [OS=Homo sapiens]	PLPBP
Q15819	Ubiquitin-conjugating enzyme E2 variant 2 [OS=Homo sapiens]	UBE2V2
P25786	Proteasome subunit alpha type-1 [OS=Homo sapiens]	PSMA1
Q9NS84	Carbohydrate sulfotransferase 7 [OS=Homo sapiens]	CHST7
Q96QK1	Vacuolar protein sorting-associated protein 35 [OS=Homo sapiens]	VPS35
P07911	Uromodulin [OS=Homo sapiens]	UMOD
P27695	DNA-(apurinic or apyrimidinic site) endonuclease [OS=Homo sapiens]	APEX1
Q9UD71	Protein phosphatase 1 regulatory subunit 1B [OS=Homo sapiens]	PPP1R1B
P61978	Heterogeneous nuclear ribonucleoprotein K [OS=Homo sapiens]	HNRNPK
Q86YD5	Low-density lipoprotein receptor class A domain-containing protein 3 [OS=Homo sapiens]	LDLRAD3
P17927	Complement receptor type 1 [OS=Homo sapiens]	CR1
P07478	Trypsin-2 [OS=Homo sapiens]	PRSS2
Q7L985	Leucine-rich repeat and immunoglobulin-like domain-containing nogo receptor-interacting protein 2 [OS=Homo sapiens]	LINGO2
Q9H3S4	Thiamin pyrophosphokinase 1 [OS=Homo sapiens]	TPK1
Q15286	Ras-related protein Rab-35 [OS=Homo sapiens]	RAB35
P36269	Glutathione hydrolase 5 proenzyme [OS=Homo sapiens]	GGT5
Q13591	Semaphorin-5A [OS=Homo sapiens]	SEMA5A
O43752	Syntaxin-6 [OS=Homo sapiens]	STX6
Q6UW01	Cerebellin-3 [OS=Homo sapiens]	CBLN3
Q9NRJ7	Protocadherin beta-16 [OS=Homo sapiens]	PCDHB16
O15123	Angiopoietin-2 [OS=Homo sapiens]	ANGPT2
Q6ZMJ4	Interleukin-34 [OS=Homo sapiens]	IL34
P98161	Polycystin-1 [OS=Homo sapiens]	PKD1
P21589	5'-nucleotidase [OS=Homo sapiens]	NT5E
Q05682	Caldesmon [OS=Homo sapiens]	CALD1
Q7Z6M3	Allergin-1 [OS=Homo sapiens]	MILR1
O00622	CCN family member 1 [OS=Homo sapiens]	CCN1
O95084	Serine protease 23 [OS=Homo sapiens]	PRSS23
O76076	CCN family member 5 [OS=Homo sapiens]	CCN5
O60869	Endothelial differentiation-related factor 1 [OS=Homo sapiens]	EDF1
P61088	Ubiquitin-conjugating enzyme E2 N [OS=Homo sapiens]	UBE2N
Q04609	Glutamate carboxypeptidase 2 [OS=Homo sapiens]	FOLH1
Q8NC44	Reticulophagy regulator 2 [OS=Homo sapiens]	RETREG2
O75629	Protein CREG1 [OS=Homo sapiens]	CREG1
P62491	Ras-related protein Rab-11A [OS=Homo sapiens]	RAB11A
P06756	Integrin alpha-V [OS=Homo sapiens]	ITGAV
Q6JBY9	CapZ-interacting protein [OS=Homo sapiens]	RCSD1
Q9UGN4	CMRF35-like molecule 8 [OS=Homo sapiens]	CD300A
Q9H4G0	Band 4.1-like protein 1 [OS=Homo sapiens]	EPB41L1
Q9Y5I2	Protocadherin alpha-10 [OS=Homo sapiens]	PCDHA10
P42857	Neuronal vesicle trafficking-associated protein 1 [OS=Homo sapiens]	NSG1
P13284	Gamma-interferon-inducible lysosomal thiol reductase [OS=Homo sapiens]	IFI30
Q6ZMM2	ADAMTS-like protein 5 [OS=Homo sapiens]	ADAMTSL5
P60880	Synaptosomal-associated protein 25 [OS=Homo sapiens]	SNAP25
Q8WUG5	Solute carrier family 22 member 17 [OS=Homo sapiens]
Q96AT9	Ribulose-phosphate 3-epimerase [OS=Homo sapiens]	RPE
P35247	Pulmonary surfactant-associated protein D [OS=Homo sapiens]	SFTPD
Q6UWY0	Arylsulfatase K [OS=Homo sapiens]	ARSK
P51149	Ras-related protein Rab-7a [OS=Homo sapiens]	RAB7A
P50897	Palmitoyl-protein thioesterase 1 [OS=Homo sapiens]	PPT1
P32942	Intercellular adhesion molecule 3 [OS=Homo sapiens]	ICAM3
Q9BYJ0	Fibroblast growth factor-binding protein 2 [OS=Homo sapiens]	FGFBP2
Q07075	Glutamyl aminopeptidase [OS=Homo sapiens]	ENPEP
P08138	Tumor necrosis factor receptor superfamily member 16 [OS=Homo sapiens]	NGFR
Q16775	Hydroxyacylglutathione hydrolase, mitochondrial [OS=Homo sapiens]	HAGH
Q9UMX0	Ubiquilin-1 [OS=Homo sapiens]	UBQLN1
Q9UGT4	Sushi domain-containing protein 2 [OS=Homo sapiens]	SUSD2
Q8N386	Leucine-rich repeat-containing protein 25 [OS=Homo sapiens]	LRRC25
P47755	F-actin-capping protein subunit alpha-2 [OS=Homo sapiens]	CAPZA2
Q07960	Rho GTPase-activating protein 1 [OS=Homo sapiens]	ARHGAP1
Q9Y2C2	Uronyl 2-sulfotransferase [OS=Homo sapiens]	UST
Q7Z5N4	Protein sidekick-1 [OS=Homo sapiens]	SDK1
Q8N3H0	Chemokine-like protein TAFA-2 [OS=Homo sapiens]	TAFA2
Q13409	Cytoplasmic dynein 1 intermediate chain 2 [OS=Homo sapiens]	DYNC1I2
Q9NPH0	Lysophosphatidic acid phosphatase type 6 [OS=Homo sapiens]	ACP6
Q9P2E5	Chondroitin sulfate glucuronyltransferase [OS=Homo sapiens]	CHPF2
Q8IUK8	Cerebellin-2 [OS=Homo sapiens]	CBLN2
P43034	Platelet-activating factor acetylhydrolase IB subunit beta [OS=Homo sapiens]	PAFAH1B1
Q9NPF0	CD320 antigen [OS=Homo sapiens]	CD320
Q8NBJ5	Procollagen galactosyltransferase 1 [OS=Homo sapiens]	COLGALT1
Q9Y624	Junctional adhesion molecule A [OS=Homo sapiens]	F11R
P54687	Branched-chain-amino-acid aminotransferase, cytosolic [OS=Homo sapiens]	BCAT1
Q13907	Isopentenyl-diphosphate Delta-isomerase 1 [OS=Homo sapiens]	IDI1
Q86WC4	Osteopetrosis-associated transmembrane protein 1 [OS=Homo sapiens]	OSTM1
Q53RT3	Retroviral-like aspartic protease 1 [OS=Homo sapiens]	ASPRV1
Q7KYR7	Butyrophilin subfamily 2 member A1 [OS=Homo sapiens]	BTN2A1
P46976	Glycogenin-1 [OS=Homo sapiens]	GYG1
Q9P2B2	Prostaglandin F2 receptor negative regulator [OS=Homo sapiens]	PTGFRN
Q9H239	Matrix metalloproteinase-28 [OS=Homo sapiens]	MMP28
Q9HB71	Calcyclin-binding protein [OS=Homo sapiens]	CACYBP
Q5JWF2	Guanine nucleotide-binding protein G(s) subunit alpha isoforms XLas [OS=Homo sapiens]	GNAS
P56199	Integrin alpha-1 [OS=Homo sapiens]	ITGA1
Q9NT68	Teneurin-2 [OS=Homo sapiens]	TENM2
P46952	3-hydroxyanthranilate 3,4-dioxygenase [OS=Homo sapiens]	HAAO
P11137	Microtubule-associated protein 2 [OS=Homo sapiens]	MAP2
P04350	Tubulin beta-4A chain [OS=Homo sapiens]	TUBB4A
Q9Y336	Sialic acid-binding Ig-like lectin 9 [OS=Homo sapiens]	SIGLEC9
P01282	VIP peptides [OS=Homo sapiens]	VIP
P49189	4-trimethylaminobutyraldehyde dehydrogenase [OS=Homo sapiens]	ALDH9A1
P61086	Ubiquitin-conjugating enzyme E2 K [OS=Homo sapiens]	UBE2K
O15144	Actin-related protein 2/3 complex subunit 2 [OS=Homo sapiens]	ARPC2
Q7Z4H3	5'-deoxynucleotidase HDDC2 [OS=Homo sapiens]	HDDC2
Q9BXN1	Asporin [OS=Homo sapiens]	ASPN
Q10589	Bone marrow stromal antigen 2 [OS=Homo sapiens]	BST2
Q9P2K2	Thioredoxin domain-containing protein 16 [OS=Homo sapiens]	TXNDC16
P08134	Rho-related GTP-binding protein RhoC [OS=Homo sapiens]	RHOC
P46926	Glucosamine-6-phosphate isomerase 1 [OS=Homo sapiens]	GNPDA1
Q9UK76	Jupiter microtubule associated homolog 1 [OS=Homo sapiens]	JPT1
P06454	Prothymosin alpha [OS=Homo sapiens]	PTMA
P61106	Ras-related protein Rab-14 [OS=Homo sapiens]	RAB14
Q14162	Scavenger receptor class F member 1 [OS=Homo sapiens]	SCARF1
Q9Y2S2	Lambda-crystallin homolog [OS=Homo sapiens]	CRYL1
Q86T13	C-type lectin domain family 14 member A [OS=Homo sapiens]	CLEC14A
P28300	Protein-lysine 6-oxidase [OS=Homo sapiens]	LOX
Q9H098	Protein FAM107B [OS=Homo sapiens]	FAM107B
Q15043	Metal cation symporter ZIP14 [OS=Homo sapiens]	SLC39A14
B2RUY7	von Willebrand factor C domain-containing protein 2-like [OS=Homo sapiens]	VWC2L
Q12765	Secernin-1 [OS=Homo sapiens]	SCRN1
Q9H0Q3	FXYD domain-containing ion transport regulator 6 [OS=Homo sapiens]	FXYD6
P16278	Beta-galactosidase [OS=Homo sapiens]	GLB1
P32754	4-hydroxyphenylpyruvate dioxygenase [OS=Homo sapiens]	HPD
Q6NUI6	Chondroadherin-like protein [OS=Homo sapiens]	CHADL
Q9P0S2	Cytochrome c oxidase assembly protein COX16 homolog, mitochondrial [OS=Homo sapiens]	COX16
Q99805	Transmembrane 9 superfamily member 2 [OS=Homo sapiens]	TM9SF2
Q96JK4	HHIP-like protein 1 [OS=Homo sapiens]	HHIPL1
Q15836	Vesicle-associated membrane protein 3 [OS=Homo sapiens]	VAMP3
Q9H665	IGF-like family receptor 1 [OS=Homo sapiens]	IGFLR1
P78352	Disks large homolog 4 [OS=Homo sapiens]	DLG4
P15153	Ras-related C3 botulinum toxin substrate 2 [OS=Homo sapiens]	RAC2
Q9BUJ0	Protein ABHD14A [OS=Homo sapiens]	ABHD14A
Q9UBX8	Beta-1,4-galactosyltransferase 6 [OS=Homo sapiens]	B4GALT6
Q96EE4	Coiled-coil domain-containing protein 126 [OS=Homo sapiens]	CCDC126
Q53H76	Phospholipase A1 member A [OS=Homo sapiens]	PLA1A
Q9H4G4	Golgi-associated plant pathogenesis-related protein 1 [OS=Homo sapiens]	GLIPR2
Q9ULU8	Calcium-dependent secretion activator 1 [OS=Homo sapiens]	CADPS
P55145	Mesencephalic astrocyte-derived neurotrophic factor [OS=Homo sapiens]	MANF
Q14108	Lysosome membrane protein 2 [OS=Homo sapiens]	SCARB2
P10124	Serglycin [OS=Homo sapiens]	SRGN
Q5JTV8	Torsin-1A-interacting protein 1 [OS=Homo sapiens]	TOR1AIP1
Q9BUP0	EF-hand domain-containing protein D1 [OS=Homo sapiens]	EFHD1
P54803	Galactocerebrosidase [OS=Homo sapiens]	GALC
Q96S66	Chloride channel CLIC-like protein 1 [OS=Homo sapiens]	CLCC1
P53801	Pituitary tumor-transforming gene 1 protein-interacting protein [OS=Homo sapiens]	PTTG1IP
Q9H169	Stathmin-4 [OS=Homo sapiens]	STMN4
Q9Y6U3	Scinderin [OS=Homo sapiens]	SCIN
Q5JXA9	Signal-regulatory protein beta-2 [OS=Homo sapiens]	SIRPB2
Q16623	Syntaxin-1A [OS=Homo sapiens]	STX1A
Q6WN34	Chordin-like protein 2 [OS=Homo sapiens]	CHRDL2
Q8N573	Oxidation resistance protein 1 [OS=Homo sapiens]	OXR1
O00548	Delta-like protein 1 [OS=Homo sapiens]	DLL1
P42261	Glutamate receptor 1 [OS=Homo sapiens]	GRIA1
Q92187	CMP-N-acetylneuraminate-poly-alpha-2,8-sialyltransferase [OS=Homo sapiens]	ST8SIA4
Q8WUD1	Ras-related protein Rab-2B [OS=Homo sapiens]	RAB2B
P30990	Neurotensin/neuromedin N [OS=Homo sapiens]	NTS
P06737	Glycogen phosphorylase, liver form [OS=Homo sapiens]	PYGL
Q9BR76	Coronin-1B [OS=Homo sapiens]	CORO1B
Q9UFN0	Protein NipSnap homolog 3A [OS=Homo sapiens]	NIPSNAP3A
Q14210	Lymphocyte antigen 6D [OS=Homo sapiens]	LY6D
Q96J42	Thioredoxin domain-containing protein 15 [OS=Homo sapiens]	TXNDC15
Q9NY25	C-type lectin domain family 5 member A [OS=Homo sapiens]	CLEC5A
Q9Y644	Beta-1,3-N-acetylglucosaminyltransferase radical fringe [OS=Homo sapiens]	RFNG
P78559	Microtubule-associated protein 1A [OS=Homo sapiens]	MAP1A
Q9BVK6	Transmembrane emp24 domain-containing protein 9 [OS=Homo sapiens]	TMED9
Q9H6E4	Coiled-coil domain-containing protein 134 [OS=Homo sapiens]	CCDC134
Q6P995	Protein FAM171B [OS=Homo sapiens]	FAM171B
O43323	Desert hedgehog protein [OS=Homo sapiens]	DHH
P00813	Adenosine deaminase [OS=Homo sapiens]	ADA
P62760	Visinin-like protein 1 [OS=Homo sapiens]	VSNL1
O95025	Semaphorin-3D [OS=Homo sapiens]	SEMA3D
P25788	Proteasome subunit alpha type-3 [OS=Homo sapiens]	PSMA3
O43240	Kallikrein-10 [OS=Homo sapiens]	KLK10
Q02790	Peptidyl-prolyl cis-trans isomerase FKBP4 [OS=Homo sapiens]	FKBP4
Q9BWV1	Brother of CDO [OS=Homo sapiens]	BOC
Q4G148	Glucoside xylosyltransferase 1 [OS=Homo sapiens]	GXYLT1
P07910	Heterogeneous nuclear ribonucleoproteins C1/C2 [OS=Homo sapiens]	HNRNPC
Q8IXK2	Polypeptide N-acetylgalactosaminyltransferase 12 [OS=Homo sapiens]	GALNT12
Q9Y2J0	Rabphilin-3A [OS=Homo sapiens]	RPH3A
P21583	Kit ligand [OS=Homo sapiens]	KITLG
Q8NI32	Ly6/PLAUR domain-containing protein 6B [OS=Homo sapiens]	LYPD6B
Q30154	HLA class II histocompatibility antigen, DR beta 5 chain [OS=Homo sapiens]	HLA-DRB5
Q6UX15	Layilin [OS=Homo sapiens]	LAYN
O60353	Frizzled-6 [OS=Homo sapiens]	FZD6
Q9H446	RWD domain-containing protein 1 [OS=Homo sapiens]	RWDD1
Q15435	Protein phosphatase 1 regulatory subunit 7 [OS=Homo sapiens]	PPP1R7
P12429	Annexin A3 [OS=Homo sapiens]	ANXA3
P78410	Butyrophilin subfamily 3 member A2 [OS=Homo sapiens]	BTN3A2
O43286	Beta-1,4-galactosyltransferase 5 [OS=Homo sapiens]	B4GALT5
P07307	Asialoglycoprotein receptor 2 [OS=Homo sapiens]	ASGR2
Q12959	Disks large homolog 1 [OS=Homo sapiens]	DLG1
P06732	Creatine kinase M-type [OS=Homo sapiens]	CKM
P01772	Immunoglobulin heavy variable 3-33 [OS=Homo sapiens]	IGHV3-33
Q8TB96	T-cell immunomodulatory protein [OS=Homo sapiens]	ITFG1
Q6PUV4	Complexin-2 [OS=Homo sapiens]	CPLX2
Q9Y5X9	Endothelial lipase [OS=Homo sapiens]	LIPG
O43396	Thioredoxin-like protein 1 [OS=Homo sapiens]	TXNL1
Q9UN73	Protocadherin alpha-6 [OS=Homo sapiens]	PCDHA6
P02778	C-X-C motif chemokine 10 [OS=Homo sapiens]	CXCL10
P26842	CD27 antigen [OS=Homo sapiens]	CD27
Q9Y6F9	Protein Wnt-6 [OS=Homo sapiens]	WNT6
P34949	Mannose-6-phosphate isomerase [OS=Homo sapiens]	MPI
O60741	Potassium/sodium hyperpolarization-activated cyclic nucleotide-gated channel 1 [OS=Homo sapiens]	HCN1
Q9UJC5	SH3 domain-binding glutamic acid-rich-like protein 2 [OS=Homo sapiens]	SH3BGRL2
O14745	Na(+)/H(+) exchange regulatory cofactor NHE-RF1 [OS=Homo sapiens]	NHERF1
Q02763	Angiopoietin-1 receptor [OS=Homo sapiens]	TEK
O14579	Coatomer subunit epsilon [OS=Homo sapiens]	COPE
Q16576	Histone-binding protein RBBP7 [OS=Homo sapiens]	RBBP7
Q9BT09	Protein canopy homolog 3 [OS=Homo sapiens]	CNPY3
P59768	Guanine nucleotide-binding protein G(I)/G(S)/G(O) subunit gamma-2 [OS=Homo sapiens]	GNG2
O15126	Secretory carrier-associated membrane protein 1 [OS=Homo sapiens]	SCAMP1
Q14832	Metabotropic glutamate receptor 3 [OS=Homo sapiens]	GRM3
Q9NWD8	Transmembrane protein 248 [OS=Homo sapiens]	TMEM248
Q9UBM8	Alpha-1,3-mannosyl-glycoprotein 4-beta-N-acetylglucosaminyltransferase C [OS=Homo sapiens]	MGAT4C
P49454	Centromere protein F [OS=Homo sapiens]	CENPF
Q9NQ34	Transmembrane protein 9B [OS=Homo sapiens]	TMEM9B
P78380	Oxidized low-density lipoprotein receptor 1 [OS=Homo sapiens]	OLR1
Q8TD84	Down syndrome cell adhesion molecule-like protein 1 [OS=Homo sapiens]	DSCAML1
Q07812	Apoptosis regulator BAX [OS=Homo sapiens]	BAX
P61204	ADP-ribosylation factor 3 [OS=Homo sapiens]	ARF3
Q9BRT3	Migration and invasion enhancer 1 [OS=Homo sapiens]	MIEN1
Q13873	Bone morphogenetic protein receptor type-2 [OS=Homo sapiens]	BMPR2
O75023	Leukocyte immunoglobulin-like receptor subfamily B member 5 [OS=Homo sapiens]	LILRB5
P63098	Calcineurin subunit B type 1 [OS=Homo sapiens]	PPP3R1
P00749	Urokinase-type plasminogen activator [OS=Homo sapiens]	PLAU
Q9UBS5	Gamma-aminobutyric acid type B receptor subunit 1 [OS=Homo sapiens]	GABBR1
P17302	Gap junction alpha-1 protein [OS=Homo sapiens]	GJA1
P62253	Ubiquitin-conjugating enzyme E2 G1 [OS=Homo sapiens]	UBE2G1
Q8WWM9	Cytoglobin [OS=Homo sapiens]	CYGB
Q9Y5G2	Protocadherin gamma-B2 [OS=Homo sapiens]	PCDHGB2
P30044	Peroxiredoxin-5, mitochondrial [OS=Homo sapiens]	PRDX5
P00167	Cytochrome b5 [OS=Homo sapiens]	CYB5A
P40123	Adenylyl cyclase-associated protein 2 [OS=Homo sapiens]	CAP2
Q6WRI0	Immunoglobulin superfamily member 10 [OS=Homo sapiens]	IGSF10
O14908	PDZ domain-containing protein GIPC1 [OS=Homo sapiens]	GIPC1
Q13683	Integrin alpha-7 [OS=Homo sapiens]	ITGA7
P0DPK3	Notch homolog 2 N-terminal-like protein B [OS=Homo sapiens]	NOTCH2NLB
Q16627	C-C motif chemokine 14 [OS=Homo sapiens]	CCL14
P39656	Dolichyl-diphosphooligosaccharide--protein glycosyltransferase 48 kDa subunit [OS=Homo sapiens]	DDOST
O15498	Synaptobrevin homolog YKT6 [OS=Homo sapiens]	YKT6
O95302	Peptidyl-prolyl cis-trans isomerase FKBP9 [OS=Homo sapiens]	FKBP9
Q7L0J3	Synaptic vesicle glycoprotein 2A [OS=Homo sapiens]	SV2A
Q15198	Platelet-derived growth factor receptor-like protein [OS=Homo sapiens]	PDGFRL
Q8TDQ1	CMRF35-like molecule 1 [OS=Homo sapiens]	CD300LF
Q92956	Tumor necrosis factor receptor superfamily member 14 [OS=Homo sapiens]	TNFRSF14
P61160	Actin-related protein 2 [OS=Homo sapiens]	ACTR2
Q9UQP3	Tenascin-N [OS=Homo sapiens]	TNN
P58546	Myotrophin [OS=Homo sapiens]	MTPN
P35625	Metalloproteinase inhibitor 3 [OS=Homo sapiens]	TIMP3
Q9H902	Receptor expression-enhancing protein 1 [OS=Homo sapiens]	REEP1
Q15274	Nicotinate-nucleotide pyrophosphorylase [carboxylating] [OS=Homo sapiens]	QPRT
Q86UE6	Leucine-rich repeat transmembrane neuronal protein 1 [OS=Homo sapiens]	LRRTM1
Q9NR12	PDZ and LIM domain protein 7 [OS=Homo sapiens]	PDLIM7
Q6ZU80	Centrosomal protein of 128 kDa [OS=Homo sapiens]	CEP128
Q9Y2Z0	Protein SGT1 homolog [OS=Homo sapiens]	SUGT1
P51511	Matrix metalloproteinase-15 [OS=Homo sapiens]	MMP15
Q9BWD1	Acetyl-CoA acetyltransferase, cytosolic [OS=Homo sapiens]	ACAT2
Q9BVC6	Transmembrane protein 109 [OS=Homo sapiens]	TMEM109
Q13642	Four and a half LIM domains protein 1 [OS=Homo sapiens]	FHL1
Q01151	CD83 antigen [OS=Homo sapiens]	CD83
O95971	CD160 antigen [OS=Homo sapiens]	CD160
P28072	Proteasome subunit beta type-6 [OS=Homo sapiens]	PSMB6
P56211	cAMP-regulated phosphoprotein 19 [OS=Homo sapiens]	ARPP19
Q13018	Secretory phospholipase A2 receptor [OS=Homo sapiens]	PLA2R1
Q9P246	Stromal interaction molecule 2 [OS=Homo sapiens]	STIM2
Q9H6X2	Anthrax toxin receptor 1 [OS=Homo sapiens]	ANTXR1
Q96EQ0	Small glutamine-rich tetratricopeptide repeat-containing protein beta [OS=Homo sapiens]	SGTB
Q9Y5G8	Protocadherin gamma-A5 [OS=Homo sapiens]	PCDHGA5
Q9BYE9	Cadherin-related family member 2 [OS=Homo sapiens]	CDHR2
P31153	S-adenosylmethionine synthase isoform type-2 [OS=Homo sapiens]	MAT2A
Q11206	CMP-N-acetylneuraminate-beta-galactosamide-alpha-2,3-sialyltransferase 4 [OS=Homo sapiens]	ST3GAL4
P20333	Tumor necrosis factor receptor superfamily member 1B [OS=Homo sapiens]	TNFRSF1B
Q86WK6	Amphoterin-induced protein 1 [OS=Homo sapiens]	AMIGO1
Q9Y2B1	Ribitol-5-phosphate xylosyltransferase 1 [OS=Homo sapiens]	RXYLT1
P30154	Serine/threonine-protein phosphatase 2A 65 kDa regulatory subunit A beta isoform [OS=Homo sapiens]	PPP2R1B
Q93083	Metallothionein-1L [OS=Homo sapiens]	MT1L
Q6P587	Acylpyruvase FAHD1, mitochondrial [OS=Homo sapiens]	FAHD1
P19971	Thymidine phosphorylase [OS=Homo sapiens]	TYMP
Q9H8Y8	Golgi reassembly-stacking protein 2 [OS=Homo sapiens]	GORASP2
P54578	Ubiquitin carboxyl-terminal hydrolase 14 [OS=Homo sapiens]	USP14
Q96A49	Synapse-associated protein 1 [OS=Homo sapiens]	SYAP1
Q9BZV3	Interphotoreceptor matrix proteoglycan 2 [OS=Homo sapiens]	IMPG2
Q8IUL8	Cartilage intermediate layer protein 2 [OS=Homo sapiens]	CILP2
P05186	Alkaline phosphatase, tissue-nonspecific isozyme [OS=Homo sapiens]	ALPL
Q7Z5A9	Chemokine-like protein TAFA-1 [OS=Homo sapiens]	TAFA1
Q86VP1	Tax1-binding protein 1 [OS=Homo sapiens]	TAX1BP1
P07738	Bisphosphoglycerate mutase [OS=Homo sapiens]	BPGM
P58549	FXYD domain-containing ion transport regulator 7 [OS=Homo sapiens]	FXYD7
O60259	Kallikrein-8 [OS=Homo sapiens]	KLK8
O95467	Neuroendocrine secretory protein 55 [OS=Homo sapiens]	GNAS
P59998	Actin-related protein 2/3 complex subunit 4 [OS=Homo sapiens]	ARPC4
P05161	Ubiquitin-like protein ISG15 [OS=Homo sapiens]	ISG15
Q9BX66	Sorbin and SH3 domain-containing protein 1 [OS=Homo sapiens]	SORBS1
P50281	Matrix metalloproteinase-14 [OS=Homo sapiens]	MMP14
P24588	A-kinase anchor protein 5 [OS=Homo sapiens]	AKAP5
Q6UY14	ADAMTS-like protein 4 [OS=Homo sapiens]	ADAMTSL4
Q6NZI2	Caveolae-associated protein 1 [OS=Homo sapiens]	CAVIN1
O75363	Breast carcinoma-amplified sequence 1 [OS=Homo sapiens]	BCAS1
Q9H0W9	Ester hydrolase C11orf54 [OS=Homo sapiens]	C11orf54
Q06124	Tyrosine-protein phosphatase non-receptor type 11 [OS=Homo sapiens]	PTPN11
Q969Y0	NXPE family member 3 [OS=Homo sapiens]	NXPE3
Q9UDW1	Cytochrome b-c1 complex subunit 9 [OS=Homo sapiens]	UQCR10
Q96GP6	Scavenger receptor class F member 2 [OS=Homo sapiens]	SCARF2
Q8N6Y1	Protocadherin-20 [OS=Homo sapiens]	PCDH20
O75822	Eukaryotic translation initiation factor 3 subunit J [OS=Homo sapiens]	EIF3J
Q8WXB1	Protein N-lysine methyltransferase METTL21A [OS=Homo sapiens]	METTL21A
P49961	Ectonucleoside triphosphate diphosphohydrolase 1 [OS=Homo sapiens]	ENTPD1
Q96QV1	Hedgehog-interacting protein [OS=Homo sapiens]	HHIP
P04839	Cytochrome b-245 heavy chain [OS=Homo sapiens]	CYBB
P49418	Amphiphysin [OS=Homo sapiens]	AMPH
Q96HD9	N-acyl-aromatic-L-amino acid amidohydrolase (carboxylate-forming) [OS=Homo sapiens]	ACY3
Q6ZVM7	TOM1-like protein 2 [OS=Homo sapiens]	TOM1L2
Q09327	Beta-1,4-mannosyl-glycoprotein 4-beta-N-acetylglucosaminyltransferase [OS=Homo sapiens]	MGAT3
Q53GG5	PDZ and LIM domain protein 3 [OS=Homo sapiens]	PDLIM3
Q76M96	Coiled-coil domain-containing protein 80 [OS=Homo sapiens]	CCDC80
Q8NBM8	Prenylcysteine oxidase-like [OS=Homo sapiens]	PCYOX1L
P38646	Stress-70 protein, mitochondrial [OS=Homo sapiens]	HSPA9
Q8NHG7	Small VCP/p97-interacting protein [OS=Homo sapiens]	SVIP
O75462	Cytokine receptor-like factor 1 [OS=Homo sapiens]	CRLF1
P62745	Rho-related GTP-binding protein RhoB [OS=Homo sapiens]	RHOB
Q12965	Unconventional myosin-Ie [OS=Homo sapiens]	MYO1E
O14618	Copper chaperone for superoxide dismutase [OS=Homo sapiens]	CCS
Q16695	Histone H3.1t [OS=Homo sapiens]	H3-4
Q02083	N-acylethanolamine-hydrolyzing acid amidase [OS=Homo sapiens]	NAAA
P02686	Myelin basic protein [OS=Homo sapiens]	MBP
Q96A00	Protein phosphatase 1 regulatory subunit 14A [OS=Homo sapiens]	PPP1R14A
P16562	Cysteine-rich secretory protein 2 [OS=Homo sapiens]	CRISP2
P28062	Proteasome subunit beta type-8 [OS=Homo sapiens]	PSMB8
P50552	Vasodilator-stimulated phosphoprotein [OS=Homo sapiens]	VASP
Q9C0B6	BMP/retinoic acid-inducible neural-specific protein 2 [OS=Homo sapiens]	BRINP2
P01880	Immunoglobulin heavy constant delta [OS=Homo sapiens]
P49407	Beta-arrestin-1 [OS=Homo sapiens]	ARRB1
Q9Y3D6	Mitochondrial fission 1 protein [OS=Homo sapiens]	FIS1
P05114	Non-histone chromosomal protein HMG-14 [OS=Homo sapiens]	HMGN1
Q9BQG1	Synaptotagmin-3 [OS=Homo sapiens]	SYT3
Q5R3F8	Protein phosphatase 1 regulatory subunit 29 [OS=Homo sapiens]	ELFN2
O76003	Glutaredoxin-3 [OS=Homo sapiens]	GLRX3
Q5T1J5	Putative coiled-coil-helix-coiled-coil-helix domain-containing protein CHCHD2P9, mitochondrial [OS=Homo sapiens]	CHCHD2P9
Q9H5K3	Protein O-mannose kinase [OS=Homo sapiens]	POMK
Q8NC51	Plasminogen activator inhibitor 1 RNA-binding protein [OS=Homo sapiens]	SERBP1
O43897	Tolloid-like protein 1 [OS=Homo sapiens]	TLL1
Q93009	Ubiquitin carboxyl-terminal hydrolase 7 [OS=Homo sapiens]	USP7
Q6XQN6	Nicotinate phosphoribosyltransferase [OS=Homo sapiens]	NAPRT
P30533	Alpha-2-macroglobulin receptor-associated protein [OS=Homo sapiens]	LRPAP1
Q9Y5G7	Protocadherin gamma-A6 [OS=Homo sapiens]	PCDHGA6
P13942	Collagen alpha-2(XI) chain [OS=Homo sapiens]	COL11A2
Q8TCT8	Signal peptide peptidase-like 2A [OS=Homo sapiens]	SPPL2A
P55107	Growth/differentiation factor 10 [OS=Homo sapiens]	GDF10
O15455	Toll-like receptor 3 [OS=Homo sapiens]	TLR3
Q6UXN8	C-type lectin domain family 9 member A [OS=Homo sapiens]	CLEC9A
P84243	Histone H3.3 [OS=Homo sapiens]	H3-3A; H3-3B
P13500	C-C motif chemokine 2 [OS=Homo sapiens]	CCL2
P20036	HLA class II histocompatibility antigen, DP alpha 1 chain [OS=Homo sapiens]	HLA-DPA1
Q9BXN2	C-type lectin domain family 7 member A [OS=Homo sapiens]	CLEC7A
Q96TA2	ATP-dependent zinc metalloprotease YME1L1 [OS=Homo sapiens]	YME1L1
Q9H492	Microtubule-associated proteins 1A/1B light chain 3A [OS=Homo sapiens]	MAP1LC3A
P08069	Insulin-like growth factor 1 receptor [OS=Homo sapiens]	IGF1R
Q9NQW7	Xaa-Pro aminopeptidase 1 [OS=Homo sapiens]	XPNPEP1
Q5SRI9	Glycoprotein endo-alpha-1,2-mannosidase [OS=Homo sapiens]	MANEA
Q8IXA5	Sperm acrosome membrane-associated protein 3 [OS=Homo sapiens]	SPACA3
P41250	Glycine--tRNA ligase [OS=Homo sapiens]	GARS1
P32971	Tumor necrosis factor ligand superfamily member 8 [OS=Homo sapiens]	TNFSF8
Q16539	Mitogen-activated protein kinase 14 [OS=Homo sapiens]	MAPK14
Q9Y328	Neuronal vesicle trafficking-associated protein 2 [OS=Homo sapiens]	NSG2
P26447	Protein S100-A4 [OS=Homo sapiens]	S100A4
Q8NC42	E3 ubiquitin-protein ligase RNF149 [OS=Homo sapiens]	RNF149
Q6Y1H2	Very-long-chain (3R)-3-hydroxyacyl-CoA dehydratase 2 [OS=Homo sapiens]	HACD2
Q14596	Next to BRCA1 gene 1 protein [OS=Homo sapiens]	NBR1
P49327	Fatty acid synthase [OS=Homo sapiens]	FASN
P61077	Ubiquitin-conjugating enzyme E2 D3 [OS=Homo sapiens]	UBE2D3
Q9Y6V0	Protein piccolo [OS=Homo sapiens]	PCLO
Q02747	Guanylin [OS=Homo sapiens]	GUCA2A
O95407	Tumor necrosis factor receptor superfamily member 6B [OS=Homo sapiens]	TNFRSF6B
Q96HN2	Adenosylhomocysteinase 3 [OS=Homo sapiens]	AHCYL2
Q9BRR6	ADP-dependent glucokinase [OS=Homo sapiens]	ADPGK
P09467	Fructose-1,6-bisphosphatase 1 [OS=Homo sapiens]	FBP1
P12272	Parathyroid hormone-related protein [OS=Homo sapiens]	PTHLH
Q13705	Activin receptor type-2B [OS=Homo sapiens]	ACVR2B
P55957	BH3-interacting domain death agonist [OS=Homo sapiens]	BID
Q92882	Osteoclast-stimulating factor 1 [OS=Homo sapiens]	OSTF1
P01137	Transforming growth factor beta-1 proprotein [OS=Homo sapiens]
Q9H1C7	Cysteine-rich and transmembrane domain-containing protein 1 [OS=Homo sapiens]	CYSTM1
P36969	Phospholipid hydroperoxide glutathione peroxidase [OS=Homo sapiens]	GPX4
O43399	Tumor protein D54 [OS=Homo sapiens]	TPD52L2
P46439	Glutathione S-transferase Mu 5 [OS=Homo sapiens]	GSTM5
Q86V85	Integral membrane protein GPR180 [OS=Homo sapiens]	GPR180
P21757	Macrophage scavenger receptor types I and II [OS=Homo sapiens]	MSR1
Q99442	Translocation protein SEC62 [OS=Homo sapiens]	SEC62
Q9H6Y7	E3 ubiquitin-protein ligase RNF167 [OS=Homo sapiens]	RNF167
Q8TE99	2-phosphoxylose phosphatase 1 [OS=Homo sapiens]	PXYLP1
P05164	Myeloperoxidase [OS=Homo sapiens]	MPO
Q15389	Angiopoietin-1 [OS=Homo sapiens]	ANGPT1
P35606	Coatomer subunit beta' [OS=Homo sapiens]	COPB2
O95881	Thioredoxin domain-containing protein 12 [OS=Homo sapiens]	TXNDC12
Q9UPN7	Serine/threonine-protein phosphatase 6 regulatory subunit 1 [OS=Homo sapiens]	PPP6R1
Q14195	Dihydropyrimidinase-related protein 3 [OS=Homo sapiens]	DPYSL3
O14994	Synapsin-3 [OS=Homo sapiens]	SYN3
Q9UJ37	Alpha-N-acetylgalactosaminide alpha-2,6-sialyltransferase 2 [OS=Homo sapiens]	ST6GALNAC2
Q9Y520	Protein PRRC2C [OS=Homo sapiens]	PRRC2C
Q9Y5G4	Protocadherin gamma-A9 [OS=Homo sapiens]	PCDHGA9
Q13103	Secreted phosphoprotein 24 [OS=Homo sapiens]	SPP2
P34741	Syndecan-2 [OS=Homo sapiens]	SDC2
P48735	Isocitrate dehydrogenase [NADP], mitochondrial [OS=Homo sapiens]	IDH2
P80404	4-aminobutyrate aminotransferase, mitochondrial [OS=Homo sapiens]	ABAT
Q9UNF0	Protein kinase C and casein kinase substrate in neurons protein 2 [OS=Homo sapiens]	PACSIN2
Q04771	Activin receptor type-1 [OS=Homo sapiens]	ACVR1
Q9BW91	ADP-ribose pyrophosphatase, mitochondrial [OS=Homo sapiens]	NUDT9
Q9Y6Y9	Lymphocyte antigen 96 [OS=Homo sapiens]	LY96
Q8WWA0	Intelectin-1 [OS=Homo sapiens]	ITLN1
O43687	A-kinase anchor protein 7 isoforms alpha and beta [OS=Homo sapiens]	AKAP7
Q96AY3	Peptidyl-prolyl cis-trans isomerase FKBP10 [OS=Homo sapiens]	FKBP10
Q13224	Glutamate receptor ionotropic, NMDA 2B [OS=Homo sapiens]	GRIN2B
Q9UHY1	Nuclear receptor-binding protein [OS=Homo sapiens]	NRBP1
P01730	T-cell surface glycoprotein CD4 [OS=Homo sapiens]	CD4
Q9NPG1	Frizzled-3 [OS=Homo sapiens]	FZD3
O00585	C-C motif chemokine 21 [OS=Homo sapiens]	CCL21
Q7L9L4	MOB kinase activator 1B [OS=Homo sapiens]	MOB1B
Q9UII2	ATPase inhibitor, mitochondrial [OS=Homo sapiens]	ATP5IF1
P41586	Pituitary adenylate cyclase-activating polypeptide type I receptor [OS=Homo sapiens]	ADCYAP1R1
Q01974	Tyrosine-protein kinase transmembrane receptor ROR2 [OS=Homo sapiens]	ROR2
P24298	Alanine aminotransferase 1 [OS=Homo sapiens]	GPT
Q9NVZ3	Adaptin ear-binding coat-associated protein 2 [OS=Homo sapiens]	NECAP2
Q8WXS5	Voltage-dependent calcium channel gamma-8 subunit [OS=Homo sapiens]	CACNG8
Q8WZA0	Protein LZIC [OS=Homo sapiens]	LZIC
P33241	Lymphocyte-specific protein 1 [OS=Homo sapiens]	LSP1
Q9H336	Cysteine-rich secretory protein LCCL domain-containing 1 [OS=Homo sapiens]	CRISPLD1
P42081	T-lymphocyte activation antigen CD86 [OS=Homo sapiens]	CD86
Q9BRJ7	Tudor-interacting repair regulator protein [OS=Homo sapiens]	NUDT16L1
P49321	Nuclear autoantigenic sperm protein [OS=Homo sapiens]	NASP
O94813	Slit homolog 2 protein [OS=Homo sapiens]	SLIT2
P57105	Synaptojanin-2-binding protein [OS=Homo sapiens]	SYNJ2BP
P43004	Excitatory amino acid transporter 2 [OS=Homo sapiens]	SLC1A2
P23381	Tryptophan--tRNA ligase, cytoplasmic [OS=Homo sapiens]	WARS1
Q12905	Interleukin enhancer-binding factor 2 [OS=Homo sapiens]	ILF2
O94911	ABC-type organic anion transporter ABCA8 [OS=Homo sapiens]	ABCA8
Q9UHD1	Cysteine and histidine-rich domain-containing protein 1 [OS=Homo sapiens]	CHORDC1
P19883	Follistatin [OS=Homo sapiens]	FST
Q96RU3	Formin-binding protein 1 [OS=Homo sapiens]	FNBP1
Q9BT88	Synaptotagmin-11 [OS=Homo sapiens]	SYT11
Q16827	Receptor-type tyrosine-protein phosphatase O [OS=Homo sapiens]	PTPRO
P20962	Parathymosin [OS=Homo sapiens]	PTMS
P49721	Proteasome subunit beta type-2 [OS=Homo sapiens]	PSMB2
P49788	Retinoic acid receptor responder protein 1 [OS=Homo sapiens]	RARRES1
P21291	Cysteine and glycine-rich protein 1 [OS=Homo sapiens]	CSRP1
P13726	Tissue factor [OS=Homo sapiens]	F3
P28074	Proteasome subunit beta type-5 [OS=Homo sapiens]	PSMB5
P08648	Integrin alpha-5 [OS=Homo sapiens]	ITGA5
C9JVW0	Putative transmembrane protein INAFM1 [OS=Homo sapiens]	INAFM1
Q9NWM8	Peptidyl-prolyl cis-trans isomerase FKBP14 [OS=Homo sapiens]	FKBP14
Q9NRU3	Metal transporter CNNM1 [OS=Homo sapiens]	CNNM1
Q9NYI0	PH and SEC7 domain-containing protein 3 [OS=Homo sapiens]	PSD3
O43155	Leucine-rich repeat transmembrane protein FLRT2 [OS=Homo sapiens]	FLRT2
P23434	Glycine cleavage system H protein, mitochondrial [OS=Homo sapiens]	GCSH
P48960	Adhesion G protein-coupled receptor E5 [OS=Homo sapiens]	ADGRE5
Q6P4A8	Phospholipase B-like 1 [OS=Homo sapiens]	PLBD1
P51148	Ras-related protein Rab-5C [OS=Homo sapiens]	RAB5C
Q30201	Hereditary hemochromatosis protein [OS=Homo sapiens]	HFE
Q4KMG0	Cell adhesion molecule-related/down-regulated by oncogenes [OS=Homo sapiens]	CDON
P08833	Insulin-like growth factor-binding protein 1 [OS=Homo sapiens]	IGFBP1
P78357	Contactin-associated protein 1 [OS=Homo sapiens]	CNTNAP1
O00238	Bone morphogenetic protein receptor type-1B [OS=Homo sapiens]	BMPR1B
Q49AH0	Cerebral dopamine neurotrophic factor [OS=Homo sapiens]	CDNF
Q86Y78	Ly6/PLAUR domain-containing protein 6 [OS=Homo sapiens]	LYPD6
P48052	Carboxypeptidase A2 [OS=Homo sapiens]	CPA2
P28039	Acyloxyacyl hydrolase [OS=Homo sapiens]	AOAH
P12883	Myosin-7 [OS=Homo sapiens]	MYH7
P54762	Ephrin type-B receptor 1 [OS=Homo sapiens]	EPHB1
Q00577	Transcriptional activator protein Pur-alpha [OS=Homo sapiens]	PURA
O60884	DnaJ homolog subfamily A member 2 [OS=Homo sapiens]	DNAJA2
Q9NQ66	1-phosphatidylinositol 4,5-bisphosphate phosphodiesterase beta-1 [OS=Homo sapiens]	PLCB1
P49591	Serine--tRNA ligase, cytoplasmic [OS=Homo sapiens]	SARS1
O95989	Diphosphoinositol polyphosphate phosphohydrolase 1 [OS=Homo sapiens]	NUDT3
Q92824	Proprotein convertase subtilisin/kexin type 5 [OS=Homo sapiens]	PCSK5
P50990	T-complex protein 1 subunit theta [OS=Homo sapiens]	CCT8
Q8N8S7	Protein enabled homolog [OS=Homo sapiens]	ENAH
P58499	Protein FAM3B [OS=Homo sapiens]	FAM3B
Q15417	Calponin-3 [OS=Homo sapiens]	CNN3
Q9UPA5	Protein bassoon [OS=Homo sapiens]	BSN
Q9Y3Q8	TSC22 domain family protein 4 [OS=Homo sapiens]	TSC22D4
Q96A11	Galactose-3-O-sulfotransferase 3 [OS=Homo sapiens]	GAL3ST3
Q4G0F5	Vacuolar protein sorting-associated protein 26B [OS=Homo sapiens]	VPS26B
Q7Z3D4	LysM and putative peptidoglycan-binding domain-containing protein 3 [OS=Homo sapiens]	LYSMD3
Q96SZ5	2-aminoethanethiol dioxygenase [OS=Homo sapiens]	ADO
O75340	Programmed cell death protein 6 [OS=Homo sapiens]	PDCD6
Q14980	Nuclear mitotic apparatus protein 1 [OS=Homo sapiens]	NUMA1
Q93070	Ecto-ADP-ribosyltransferase 4 [OS=Homo sapiens]
Q9BTN0	Leucine-rich repeat and fibronectin type-III domain-containing protein 3 [OS=Homo sapiens]	LRFN3
P62857	40S ribosomal protein S28 [OS=Homo sapiens]	RPS28
P62333	26S proteasome regulatory subunit 10B [OS=Homo sapiens]	PSMC6
Q96BM9	ADP-ribosylation factor-like protein 8A [OS=Homo sapiens]	ARL8A
P24844	Myosin regulatory light polypeptide 9 [OS=Homo sapiens]	MYL9
P28908	Tumor necrosis factor receptor superfamily member 8 [OS=Homo sapiens]	TNFRSF8
Q8TDL5	BPI fold-containing family B member 1 [OS=Homo sapiens]	BPIFB1
O60704	Protein-tyrosine sulfotransferase 2 [OS=Homo sapiens]	TPST2
Q92890	Ubiquitin recognition factor in ER-associated degradation protein 1 [OS=Homo sapiens]	UFD1
Q9UMY4	Sorting nexin-12 [OS=Homo sapiens]	SNX12
P78369	Claudin-10 [OS=Homo sapiens]	CLDN10
Q6PK18	2-oxoglutarate and iron-dependent oxygenase domain-containing protein 3 [OS=Homo sapiens]	OGFOD3
Q9NZT2	Opioid growth factor receptor [OS=Homo sapiens]	OGFR
Q9Y3C8	Ubiquitin-fold modifier-conjugating enzyme 1 [OS=Homo sapiens]	UFC1
Q9Y561	Low-density lipoprotein receptor-related protein 12 [OS=Homo sapiens]	LRP12
Q08334	Interleukin-10 receptor subunit beta [OS=Homo sapiens]	IL10RB
Q9NVA4	Transmembrane protein 184C [OS=Homo sapiens]	TMEM184C
Q9BRN9	TM2 domain-containing protein 3 [OS=Homo sapiens]	TM2D3
Q6ZN44	Netrin receptor UNC5A [OS=Homo sapiens]	UNC5A
Q9H246	Uncharacterized protein C1orf21 [OS=Homo sapiens]	C1orf21
O60667	Fas apoptotic inhibitory molecule 3 [OS=Homo sapiens]	FCMR
O60909	Beta-1,4-galactosyltransferase 2 [OS=Homo sapiens]	B4GALT2
P46527	Cyclin-dependent kinase inhibitor 1B [OS=Homo sapiens]	CDKN1B
Q13201	Multimerin-1 [OS=Homo sapiens]	MMRN1
Q6ZRI8	Rho GTPase-activating protein 36 [OS=Homo sapiens]	ARHGAP36
Q6P4F1	Alpha-(1,3)-fucosyltransferase 10 [OS=Homo sapiens]	FUT10
O14798	Tumor necrosis factor receptor superfamily member 10C [OS=Homo sapiens]	TNFRSF10C
Q15404	Ras suppressor protein 1 [OS=Homo sapiens]	RSU1
Q6PJG9	Leucine-rich repeat and fibronectin type-III domain-containing protein 4 [OS=Homo sapiens]	LRFN4
Q8NHP6	Motile sperm domain-containing protein 2 [OS=Homo sapiens]	MOSPD2
P0DKB5	Trophoblast glycoprotein-like [OS=Homo sapiens]	TPBGL
O43653	Prostate stem cell antigen [OS=Homo sapiens]	PSCA
O95460	Matrilin-4 [OS=Homo sapiens]	MATN4
A0MZ66	Shootin-1 [OS=Homo sapiens]	SHTN1
O43497	Voltage-dependent T-type calcium channel subunit alpha-1G [OS=Homo sapiens]	CACNA1G
Q96JJ7	Protein disulfide-isomerase TMX3 [OS=Homo sapiens]	TMX3
O95969	Secretoglobin family 1D member 2 [OS=Homo sapiens]	SCGB1D2
Q2M2H8	Probable maltase-glucoamylase 2 [OS=Homo sapiens]	MGAM2
O14576	Cytoplasmic dynein 1 intermediate chain 1 [OS=Homo sapiens]	DYNC1I1
Q9H9P2	Chondrolectin [OS=Homo sapiens]	CHODL
O60507	Protein-tyrosine sulfotransferase 1 [OS=Homo sapiens]	TPST1
P83110	Serine protease HTRA3 [OS=Homo sapiens]	HTRA3
Q96CV9	Optineurin [OS=Homo sapiens]	OPTN
P49589	Cysteine--tRNA ligase, cytoplasmic [OS=Homo sapiens]	CARS1
Q6ZMJ2	Scavenger receptor class A member 5 [OS=Homo sapiens]	SCARA5
Q96MC5	bMERB domain-containing protein 1 [OS=Homo sapiens]	BMERB1
Q9UJ90	Potassium voltage-gated channel subfamily E regulatory beta subunit 5 [OS=Homo sapiens]	KCNE5
P49789	Bis(5'-adenosyl)-triphosphatase [OS=Homo sapiens]	FHIT
P13612	Integrin alpha-4 [OS=Homo sapiens]	ITGA4
Q99816	Tumor susceptibility gene 101 protein [OS=Homo sapiens]	TSG101
Q9H425	Uncharacterized protein C1orf198 [OS=Homo sapiens]	C1orf198
A8MTW9	Putative uncharacterized protein ENSP00000380674 [OS=Homo sapiens]
P55008	Allograft inflammatory factor 1 [OS=Homo sapiens]	AIF1
Q13438	Protein OS-9 [OS=Homo sapiens]	OS9
Q9NNX6	CD209 antigen [OS=Homo sapiens]	CD209
P08962	CD63 antigen [OS=Homo sapiens]	CD63
Q6NUS6	Tectonic-3 [OS=Homo sapiens]	TCTN3
O15382	Branched-chain-amino-acid aminotransferase, mitochondrial [OS=Homo sapiens]	BCAT2
Q9Y219	Protein jagged-2 [OS=Homo sapiens]	JAG2
P40145	Adenylate cyclase type 8 [OS=Homo sapiens]	ADCY8
Q6ZMW3	Echinoderm microtubule-associated protein-like 6 [OS=Homo sapiens]	EML6
P52790	Hexokinase-3 [OS=Homo sapiens]	HK3
P52849	Bifunctional heparan sulfate N-deacetylase/N-sulfotransferase 2 [OS=Homo sapiens]	NDST2
Q96C23	Galactose mutarotase [OS=Homo sapiens]	GALM
O00429	Dynamin-1-like protein [OS=Homo sapiens]	DNM1L
Q9Y570	Protein phosphatase methylesterase 1 [OS=Homo sapiens]	PPME1
Q9GZP8	Immortalization up-regulated protein [OS=Homo sapiens]	IMUP
Q07108	Early activation antigen CD69 [OS=Homo sapiens]	CD69
P30519	Heme oxygenase 2 [OS=Homo sapiens]	HMOX2
Q8NBZ7	UDP-glucuronic acid decarboxylase 1 [OS=Homo sapiens]	UXS1
Q9NQX3	Gephyrin [OS=Homo sapiens]	GPHN
O00501	Claudin-5 [OS=Homo sapiens]	CLDN5
P13498	Cytochrome b-245 light chain [OS=Homo sapiens]	CYBA
Q96L58	Beta-1,3-galactosyltransferase 6 [OS=Homo sapiens]	B3GALT6
E2RYF7	Protein PBMUCL2 [OS=Homo sapiens]	HCG22
Q4KMP7	TBC1 domain family member 10B [OS=Homo sapiens]	TBC1D10B
P61326	Protein mago nashi homolog [OS=Homo sapiens]	MAGOH
P62424	60S ribosomal protein L7a [OS=Homo sapiens]	RPL7A
Q8IUX8	Epidermal growth factor-like protein 6 [OS=Homo sapiens]	EGFL6
Q9Y3B8	Oligoribonuclease, mitochondrial [OS=Homo sapiens]	REXO2
O00233	26S proteasome non-ATPase regulatory subunit 9 [OS=Homo sapiens]	PSMD9
P16233	Pancreatic triacylglycerol lipase [OS=Homo sapiens]	PNLIP
P01189	Pro-opiomelanocortin [OS=Homo sapiens]	POMC
Q9BVH7	Alpha-N-acetylgalactosaminide alpha-2,6-sialyltransferase 5 [OS=Homo sapiens]	ST6GALNAC5
P16333	Cytoplasmic protein NCK1 [OS=Homo sapiens]	NCK1
Q7Z407	CUB and sushi domain-containing protein 3 [OS=Homo sapiens]	CSMD3
Q8IX04	Ubiquitin-conjugating enzyme E2 variant 3 [OS=Homo sapiens]	UEVLD
P53004	Biliverdin reductase A [OS=Homo sapiens]	BLVRA
Q14103	Heterogeneous nuclear ribonucleoprotein D0 [OS=Homo sapiens]	HNRNPD
O75884	Serine hydrolase RBBP9 [OS=Homo sapiens]	RBBP9
Q9H477	Ribokinase [OS=Homo sapiens]	RBKS
Q8NC54	Keratinocyte-associated transmembrane protein 2 [OS=Homo sapiens]	KCT2
Q9NZJ5	Eukaryotic translation initiation factor 2-alpha kinase 3 [OS=Homo sapiens]	EIF2AK3
Q9UKY7	Protein CDV3 homolog [OS=Homo sapiens]	CDV3
Q9UK22	F-box only protein 2 [OS=Homo sapiens]	FBXO2
P25325	3-mercaptopyruvate sulfurtransferase [OS=Homo sapiens]	MPST
Q9UJ70	N-acetyl-D-glucosamine kinase [OS=Homo sapiens]	NAGK
Q86SJ2	Amphoterin-induced protein 2 [OS=Homo sapiens]	AMIGO2
O14657	Torsin-1B [OS=Homo sapiens]	TOR1B
Q16186	Proteasomal ubiquitin receptor ADRM1 [OS=Homo sapiens]	ADRM1
Q9H910	Jupiter microtubule associated homolog 2 [OS=Homo sapiens]	JPT2
O15072	A disintegrin and metalloproteinase with thrombospondin motifs 3 [OS=Homo sapiens]	ADAMTS3
Q9Y2J2	Band 4.1-like protein 3 [OS=Homo sapiens]	EPB41L3
Q8TAD2	Interleukin-17D [OS=Homo sapiens]	IL17D
P11274	Breakpoint cluster region protein [OS=Homo sapiens]	BCR
Q9UM21	Alpha-1,3-mannosyl-glycoprotein 4-beta-N-acetylglucosaminyltransferase A [OS=Homo sapiens]	MGAT4A
P01138	Beta-nerve growth factor [OS=Homo sapiens]	NGF
P52823	Stanniocalcin-1 [OS=Homo sapiens]	STC1
Q16181	Septin-7 [OS=Homo sapiens]	SEPTIN7
Q96AJ9	Vesicle transport through interaction with t-SNAREs homolog 1A [OS=Homo sapiens]	VTI1A
P55259	Pancreatic secretory granule membrane major glycoprotein GP2 [OS=Homo sapiens]	GP2
O60524	Ribosome quality control complex subunit NEMF [OS=Homo sapiens]	NEMF
O43426	Synaptojanin-1 [OS=Homo sapiens]	SYNJ1
Q9BXS4	Transmembrane protein 59 [OS=Homo sapiens]	TMEM59
Q96I82	Kazal-type serine protease inhibitor domain-containing protein 1 [OS=Homo sapiens]	KAZALD1
O00230	Cortistatin [OS=Homo sapiens]	CORT
Q68CJ9	Cyclic AMP-responsive element-binding protein 3-like protein 3 [OS=Homo sapiens]	CREB3L3
P28907	ADP-ribosyl cyclase/cyclic ADP-ribose hydrolase 1 [OS=Homo sapiens]	CD38
Q9HAB8	Phosphopantothenate--cysteine ligase [OS=Homo sapiens]	PPCS
P18510	Interleukin-1 receptor antagonist protein [OS=Homo sapiens]	IL1RN
O96033	Molybdopterin synthase sulfur carrier subunit [OS=Homo sapiens]	MOCS2
P55884	Eukaryotic translation initiation factor 3 subunit B [OS=Homo sapiens]	EIF3B
O14817	Tetraspanin-4 [OS=Homo sapiens]	TSPAN4
A1A5C7	Solute carrier family 22 member 23 [OS=Homo sapiens]	SLC22A23
Q13938	Calcyphosin [OS=Homo sapiens]	CAPS
Q9H8M5	Metal transporter CNNM2 [OS=Homo sapiens]	CNNM2
Q8N7P1	Inactive phospholipase D5 [OS=Homo sapiens]	PLD5
Q96D05	Protein FAM241B [OS=Homo sapiens]	FAM241B
P01225	Follitropin subunit beta [OS=Homo sapiens]	FSHB
Q14116	Interleukin-18 [OS=Homo sapiens]	IL18
P29536	Leiomodin-1 [OS=Homo sapiens]	LMOD1
P05305	Endothelin-1 [OS=Homo sapiens]	EDN1
Q12929	Epidermal growth factor receptor kinase substrate 8 [OS=Homo sapiens]	EPS8
P25686	DnaJ homolog subfamily B member 2 [OS=Homo sapiens]	DNAJB2
P61366	Osteocrin [OS=Homo sapiens]	OSTN
P58062	Serine protease inhibitor Kazal-type 7 [OS=Homo sapiens]	SPINK7
B8ZZ34	Protein shisa-8 [OS=Homo sapiens]	SHISA8
Q7Z4R8	UPF0669 protein C6orf120 [OS=Homo sapiens]	C6orf120
Q9Y5U5	Tumor necrosis factor receptor superfamily member 18 [OS=Homo sapiens]	TNFRSF18
O95297	Myelin protein zero-like protein 1 [OS=Homo sapiens]	MPZL1
P26012	Integrin beta-8 [OS=Homo sapiens]	ITGB8
P78344	Eukaryotic translation initiation factor 4 gamma 2 [OS=Homo sapiens]	EIF4G2
Q9UBL0	cAMP-regulated phosphoprotein 21 [OS=Homo sapiens]	ARPP21
P01920	HLA class II histocompatibility antigen, DQ beta 1 chain [OS=Homo sapiens]	HLA-DQB1
Q9UHD8	Septin-9 [OS=Homo sapiens]	SEPTIN9
P05231	Interleukin-6 [OS=Homo sapiens]	IL6
Q2M2W7	UPF0450 protein C17orf58 [OS=Homo sapiens]	C17orf58
Q9H444	Charged multivesicular body protein 4b [OS=Homo sapiens]	CHMP4B
P17301	Integrin alpha-2 [OS=Homo sapiens]	ITGA2
B1AKI9	Isthmin-1 [OS=Homo sapiens]	ISM1
P42702	Leukemia inhibitory factor receptor [OS=Homo sapiens]	LIFR
Q99729	Heterogeneous nuclear ribonucleoprotein A/B [OS=Homo sapiens]	HNRNPAB
Q9Y5S9	RNA-binding protein 8A [OS=Homo sapiens]	RBM8A
Q9UNE7	E3 ubiquitin-protein ligase CHIP [OS=Homo sapiens]	STUB1
O60502	Protein O-GlcNAcase [OS=Homo sapiens]	OGA
Q92598	Heat shock protein 105 kDa [OS=Homo sapiens]	HSPH1
Q14432	cGMP-inhibited 3',5'-cyclic phosphodiesterase A [OS=Homo sapiens]	PDE3A
P19256	Lymphocyte function-associated antigen 3 [OS=Homo sapiens]	CD58
P29728	2'-5'-oligoadenylate synthase 2 [OS=Homo sapiens]	OAS2
Q9BXJ2	Complement C1q tumor necrosis factor-related protein 7 [OS=Homo sapiens]	C1QTNF7
P46782	40S ribosomal protein S5 [OS=Homo sapiens]	RPS5
O43597	Protein sprouty homolog 2 [OS=Homo sapiens]	SPRY2
Q8N841	Tubulin polyglutamylase TTLL6 [OS=Homo sapiens]
O43768	Alpha-endosulfine [OS=Homo sapiens]	ENSA
Q9C004	Protein sprouty homolog 4 [OS=Homo sapiens]	SPRY4
Q9UM54	Unconventional myosin-VI [OS=Homo sapiens]	MYO6
Q96N03	V-set and transmembrane domain-containing protein 2-like protein [OS=Homo sapiens]	VSTM2L
P16885	1-phosphatidylinositol 4,5-bisphosphate phosphodiesterase gamma-2 [OS=Homo sapiens]	PLCG2
P04054	Phospholipase A2 [OS=Homo sapiens]	PLA2G1B
P68402	Platelet-activating factor acetylhydrolase IB subunit alpha2 [OS=Homo sapiens]	PAFAH1B2
Q86UX7	Fermitin family homolog 3 [OS=Homo sapiens]	FERMT3
P06576	ATP synthase subunit beta, mitochondrial [OS=Homo sapiens]	ATP5F1B
B1AL88	NALCN channel auxiliary factor 1 [OS=Homo sapiens]	NALF1
O00300	Tumor necrosis factor receptor superfamily member 11B [OS=Homo sapiens]	TNFRSF11B
A0A0B4J2D5	Putative glutamine amidotransferase-like class 1 domain-containing protein 3B, mitochondrial [OS=Homo sapiens]	GATD3B
Q01813	ATP-dependent 6-phosphofructokinase, platelet type [OS=Homo sapiens]	PFKP
Q9HB63	Netrin-4 [OS=Homo sapiens]	NTN4
O76096	Cystatin-F [OS=Homo sapiens]	CST7
O95837	Guanine nucleotide-binding protein subunit alpha-14 [OS=Homo sapiens]	GNA14
Q05315	Galectin-10 [OS=Homo sapiens]	CLC
P17980	26S proteasome regulatory subunit 6A [OS=Homo sapiens]	PSMC3
P30520	Adenylosuccinate synthetase isozyme 2 [OS=Homo sapiens]	ADSS2
Q9ULP9	TBC1 domain family member 24 [OS=Homo sapiens]	TBC1D24
P21453	Sphingosine 1-phosphate receptor 1 [OS=Homo sapiens]	S1PR1
O15143	Actin-related protein 2/3 complex subunit 1B [OS=Homo sapiens]	ARPC1B
Q6BCY4	NADH-cytochrome b5 reductase 2 [OS=Homo sapiens]	CYB5R2
Q9UBD3	Cytokine SCM-1 beta [OS=Homo sapiens]	XCL2
Q96T83	Sodium/hydrogen exchanger 7 [OS=Homo sapiens]	SLC9A7
P42765	3-ketoacyl-CoA thiolase, mitochondrial [OS=Homo sapiens]	ACAA2
Q8WVX3	Uncharacterized protein C4orf3 [OS=Homo sapiens]	C4orf3
Q02742	Beta-1,3-galactosyl-O-glycosyl-glycoprotein beta-1,6-N-acetylglucosaminyltransferase [OS=Homo sapiens]	GCNT1
O75962	Triple functional domain protein [OS=Homo sapiens]	TRIO
Q86YM7	Homer protein homolog 1 [OS=Homo sapiens]	HOMER1
P48594	Serpin B4 [OS=Homo sapiens]	SERPINB4
P55010	Eukaryotic translation initiation factor 5 [OS=Homo sapiens]	EIF5
Q99623	Prohibitin-2 [OS=Homo sapiens]	PHB2
Q9H772	Gremlin-2 [OS=Homo sapiens]	GREM2
P02818	Osteocalcin [OS=Homo sapiens]	BGLAP
O00187	Mannan-binding lectin serine protease 2 [OS=Homo sapiens]	MASP2
P08949	Neuromedin-B [OS=Homo sapiens]	NMB
Q9UKZ9	Procollagen C-endopeptidase enhancer 2 [OS=Homo sapiens]	PCOLCE2
Q9H2G2	STE20-like serine/threonine-protein kinase [OS=Homo sapiens]	SLK
Q9Y6M7	Sodium bicarbonate cotransporter 3 [OS=Homo sapiens]	SLC4A7
P0CG30	Glutathione S-transferase theta-2B [OS=Homo sapiens]	GSTT2B
Q92750	Transcription initiation factor TFIID subunit 4B [OS=Homo sapiens]	TAF4B
O95793	Double-stranded RNA-binding protein Staufen homolog 1 [OS=Homo sapiens]	STAU1
P0CG36	Cryptic family protein 1B [OS=Homo sapiens]	CFC1B
Q8NHW5	60S acidic ribosomal protein P0-like [OS=Homo sapiens]	RPLP0P6
Q96FV2	Secernin-2 [OS=Homo sapiens]	SCRN2
Q99250	Sodium channel protein type 2 subunit alpha [OS=Homo sapiens]	SCN2A
Q70JA7	Chondroitin sulfate synthase 3 [OS=Homo sapiens]	CHSY3
Q92783	Signal transducing adapter molecule 1 [OS=Homo sapiens]	STAM
Q96CS7	Pleckstrin homology domain-containing family B member 2 [OS=Homo sapiens]	PLEKHB2
Q8TDY8	Immunoglobulin superfamily DCC subclass member 4 [OS=Homo sapiens]	IGDCC4
P62495	Eukaryotic peptide chain release factor subunit 1 [OS=Homo sapiens]	ETF1
Q496J9	Synaptic vesicle glycoprotein 2C [OS=Homo sapiens]	SV2C
Q9Y5E4	Protocadherin beta-5 [OS=Homo sapiens]	PCDHB5
P16389	Potassium voltage-gated channel subfamily A member 2 [OS=Homo sapiens]	KCNA2
Q8TCU4	Alstrom syndrome protein 1 [OS=Homo sapiens]	ALMS1
P51858	Hepatoma-derived growth factor [OS=Homo sapiens]	HDGF
Q9H0B8	Cysteine-rich secretory protein LCCL domain-containing 2 [OS=Homo sapiens]	CRISPLD2
Q2HXU8	C-type lectin domain family 12 member B [OS=Homo sapiens]	CLEC12B
O15078	Centrosomal protein of 290 kDa [OS=Homo sapiens]	CEP290
Q5JXM2	Probable methyltransferase-like protein 24 [OS=Homo sapiens]	METTL24
Q9NS71	Gastrokine-1 [OS=Homo sapiens]	GKN1
P24534	Elongation factor 1-beta [OS=Homo sapiens]	EEF1B2
Q9Y3Q3	Transmembrane emp24 domain-containing protein 3 [OS=Homo sapiens]	TMED3
P41594	Metabotropic glutamate receptor 5 [OS=Homo sapiens]	GRM5
A0A584	T cell receptor beta variable 11-2 [OS=Homo sapiens]	TRBV11-2
Q9BT56	Spexin [OS=Homo sapiens]	SPX
Q9NYJ1	Cytochrome c oxidase assembly factor 4 homolog, mitochondrial [OS=Homo sapiens]	COA4
Q9H3K6	BolA-like protein 2 [OS=Homo sapiens]	BOLA2; BOLA2B
Q01970	1-phosphatidylinositol 4,5-bisphosphate phosphodiesterase beta-3 [OS=Homo sapiens]	PLCB3
P16066	Atrial natriuretic peptide receptor 1 [OS=Homo sapiens]	NPR1
P60022	Beta-defensin 1 [OS=Homo sapiens]	DEFB1
P05976	Myosin light chain 1/3, skeletal muscle isoform [OS=Homo sapiens]	MYL1
Q4ZHG4	Fibronectin type III domain-containing protein 1 [OS=Homo sapiens]	FNDC1
P04233	HLA class II histocompatibility antigen gamma chain [OS=Homo sapiens]	CD74
Q8NCM8	Cytoplasmic dynein 2 heavy chain 1 [OS=Homo sapiens]	DYNC2H1
Q9P244	Leucine-rich repeat and fibronectin type III domain-containing protein 1 [OS=Homo sapiens]	LRFN1
P62310	U6 snRNA-associated Sm-like protein LSm3 [OS=Homo sapiens]	LSM3
P25705	ATP synthase subunit alpha, mitochondrial [OS=Homo sapiens]	ATP5F1A
P61925	cAMP-dependent protein kinase inhibitor alpha [OS=Homo sapiens]	PKIA
Q96HR3	Mediator of RNA polymerase II transcription subunit 30 [OS=Homo sapiens]	MED30
P20155	Serine protease inhibitor Kazal-type 2 [OS=Homo sapiens]	SPINK2
Q5H9L2	Transcription elongation factor A protein-like 5 [OS=Homo sapiens]	TCEAL5
O00292	Left-right determination factor 2 [OS=Homo sapiens]	LEFTY2
Q15370	Elongin-B [OS=Homo sapiens]	ELOB
P07919	Cytochrome b-c1 complex subunit 6, mitochondrial [OS=Homo sapiens]	UQCRH
G9CGD6	CNK3/IPCEF1 fusion protein [OS=Homo sapiens]	CNK3/IPCEF1
P07320	Gamma-crystallin D [OS=Homo sapiens]	CRYGD
P61457	Pterin-4-alpha-carbinolamine dehydratase [OS=Homo sapiens]	PCBD1
P04843	Dolichyl-diphosphooligosaccharide--protein glycosyltransferase subunit 1 [OS=Homo sapiens]	RPN1
Q13153	Serine/threonine-protein kinase PAK 1 [OS=Homo sapiens]	PAK1
Q8N441	Fibroblast growth factor receptor-like 1 [OS=Homo sapiens]	FGFRL1
P43487	Ran-specific GTPase-activating protein [OS=Homo sapiens]	RANBP1
O00148	ATP-dependent RNA helicase DDX39A [OS=Homo sapiens]	DDX39A
P23327	Sarcoplasmic reticulum histidine-rich calcium-binding protein [OS=Homo sapiens]	HRC
P35637	RNA-binding protein FUS [OS=Homo sapiens]	FUS
O43237	Cytoplasmic dynein 1 light intermediate chain 2 [OS=Homo sapiens]	DYNC1LI2
P49773	Adenosine 5'-monophosphoramidase HINT1 [OS=Homo sapiens]	HINT1
Q9Y6E2	eIF5-mimic protein 1 [OS=Homo sapiens]	BZW2
P49763	Placenta growth factor [OS=Homo sapiens]	PGF
Q9H9K5	Endogenous retroviral envelope protein HEMO [OS=Homo sapiens]	ERVMER34-1
Q6J9G0	Tyrosine-protein kinase STYK1 [OS=Homo sapiens]	STYK1
P81534	Beta-defensin 103 [OS=Homo sapiens]	DEFB103A; DEFB103B
P67809	Y-box-binding protein 1 [OS=Homo sapiens]	YBX1
Q53FA7	Quinone oxidoreductase PIG3 [OS=Homo sapiens]	TP53I3
P14867	Gamma-aminobutyric acid receptor subunit alpha-1 [OS=Homo sapiens]	GABRA1
P62750	60S ribosomal protein L23a [OS=Homo sapiens]	RPL23A
P49771	Fms-related tyrosine kinase 3 ligand [OS=Homo sapiens]	FLT3LG
Q12983	BCL2/adenovirus E1B 19 kDa protein-interacting protein 3 [OS=Homo sapiens]	BNIP3
Q9H361	Polyadenylate-binding protein 3 [OS=Homo sapiens]	PABPC3
O60330	Protocadherin gamma-A12 [OS=Homo sapiens]	PCDHGA12
Q6P1N0	Coiled-coil and C2 domain-containing protein 1A [OS=Homo sapiens]	CC2D1A
Q96H15	T-cell immunoglobulin and mucin domain-containing protein 4 [OS=Homo sapiens]	TIMD4
P33240	Cleavage stimulation factor subunit 2 [OS=Homo sapiens]	CSTF2
Q86VR8	Four-jointed box protein 1 [OS=Homo sapiens]	FJX1
P51003	Poly(A) polymerase alpha [OS=Homo sapiens]	PAPOLA
O43657	Tetraspanin-6 [OS=Homo sapiens]	TSPAN6
P49720	Proteasome subunit beta type-3 [OS=Homo sapiens]	PSMB3
Q9NSD5	Sodium- and chloride-dependent GABA transporter 2 [OS=Homo sapiens]	SLC6A13
P45880	Voltage-dependent anion-selective channel protein 2 [OS=Homo sapiens]	VDAC2
P84101	Small EDRK-rich factor 2 [OS=Homo sapiens]	SERF2
O95359	Transforming acidic coiled-coil-containing protein 2 [OS=Homo sapiens]	TACC2
Q08357	Sodium-dependent phosphate transporter 2 [OS=Homo sapiens]	SLC20A2
Q9NWV4	CXXC motif containing zinc binding protein [OS=Homo sapiens]	CZIB
P49796	Regulator of G-protein signaling 3 [OS=Homo sapiens]	RGS3
A0A1B0GUW7	Small integral membrane protein 27 [OS=Homo sapiens]	SMIM27
Q6ZSA8	Putative uncharacterized protein FLJ45684 [OS=Homo sapiens]
P55265	Double-stranded RNA-specific adenosine deaminase [OS=Homo sapiens]	ADAR
Q96K21	Abscission/NoCut checkpoint regulator [OS=Homo sapiens]	ZFYVE19
O75718	Cartilage-associated protein [OS=Homo sapiens]	CRTAP
Q9NQX4	Unconventional myosin-Vc [OS=Homo sapiens]	MYO5C
Q99732	Lipopolysaccharide-induced tumor necrosis factor-alpha factor [OS=Homo sapiens]	LITAF
P49441	Inositol polyphosphate 1-phosphatase [OS=Homo sapiens]	INPP1
P31939	Bifunctional purine biosynthesis protein ATIC [OS=Homo sapiens]	ATIC
P60660	Myosin light polypeptide 6 [OS=Homo sapiens]	MYL6
Q5T4T6	Synaptonemal complex protein 2-like [OS=Homo sapiens]	SYCP2L
Q86WG5	Myotubularin-related protein 13 [OS=Homo sapiens]	SBF2
Q9UNY4	Transcription termination factor 2 [OS=Homo sapiens]	TTF2
Q7Z4F1	Low-density lipoprotein receptor-related protein 10 [OS=Homo sapiens]	LRP10
P16383	Intron Large complex component GCFC2 [OS=Homo sapiens]	GCFC2
Q6GTS8	N-fatty-acyl-amino acid synthase/hydrolase PM20D1 [OS=Homo sapiens]	PM20D1
Q7Z7A1	Centriolin [OS=Homo sapiens]	CNTRL
Q8IW75	Serpin A12 [OS=Homo sapiens]	SERPINA12
O95197	Reticulon-3 [OS=Homo sapiens]	RTN3
P78552	Interleukin-13 receptor subunit alpha-1 [OS=Homo sapiens]	IL13RA1
Q9H3U7	SPARC-related modular calcium-binding protein 2 [OS=Homo sapiens]	SMOC2
P61081	NEDD8-conjugating enzyme Ubc12 [OS=Homo sapiens]	UBE2M
O75355	Ectonucleoside triphosphate diphosphohydrolase 3 [OS=Homo sapiens]	ENTPD3
Q01959	Sodium-dependent dopamine transporter [OS=Homo sapiens]	SLC6A3
P00403	Cytochrome c oxidase subunit 2 [OS=Homo sapiens]	MT-CO2
Q02388	Collagen alpha-1(VII) chain [OS=Homo sapiens]	COL7A1
P28330	Long-chain specific acyl-CoA dehydrogenase, mitochondrial [OS=Homo sapiens]	ACADL
P08476	Inhibin beta A chain [OS=Homo sapiens]	INHBA
Q9Y2X0	Mediator of RNA polymerase II transcription subunit 16 [OS=Homo sapiens]	MED16
O95847	Mitochondrial uncoupling protein 4 [OS=Homo sapiens]	SLC25A27
Q7Z2K8	G protein-regulated inducer of neurite outgrowth 1 [OS=Homo sapiens]	GPRIN1
Q4G0X9	Coiled-coil domain-containing protein 40 [OS=Homo sapiens]	CCDC40
Q15573	TATA box-binding protein-associated factor RNA polymerase I subunit A [OS=Homo sapiens]	TAF1A
O14958	Calsequestrin-2 [OS=Homo sapiens]	CASQ2
Q969Q6	Serine/threonine-protein phosphatase 2A regulatory subunit B'' subunit gamma [OS=Homo sapiens]	PPP2R3C
Q15691	Microtubule-associated protein RP/EB family member 1 [OS=Homo sapiens]	MAPRE1
A8MVW0	Protein FAM171A2 [OS=Homo sapiens]	FAM171A2
Q5SZB4	Uncharacterized protein C9orf50 [OS=Homo sapiens]	C9orf50
Q02383	Semenogelin-2 [OS=Homo sapiens]	SEMG2
Q96DN5	TBC1 domain family member 31 [OS=Homo sapiens]	TBC1D31
P04629	High affinity nerve growth factor receptor [OS=Homo sapiens]	NTRK1
O95622	Adenylate cyclase type 5 [OS=Homo sapiens]	ADCY5
Q6P1X5	Transcription initiation factor TFIID subunit 2 [OS=Homo sapiens]	TAF2
O00267	Transcription elongation factor SPT5 [OS=Homo sapiens]	SUPT5H
P82094	TATA element modulatory factor [OS=Homo sapiens]	TMF1
Q9UPR5	Sodium/calcium exchanger 2 [OS=Homo sapiens]	SLC8A2
Q14203	Dynactin subunit 1 [OS=Homo sapiens]	DCTN1
Q9NSD4	Zinc finger protein 275 [OS=Homo sapiens]	ZNF275
P51397	Death-associated protein 1 [OS=Homo sapiens]	DAP
Q9UBP0	Spastin [OS=Homo sapiens]	SPAST
O60291	E3 ubiquitin-protein ligase MGRN1 [OS=Homo sapiens]	MGRN1
O00587	Beta-1,3-N-acetylglucosaminyltransferase manic fringe [OS=Homo sapiens]	MFNG
Q13433	Zinc transporter ZIP6 [OS=Homo sapiens]	SLC39A6
P17031	Zinc finger protein 26 [OS=Homo sapiens]	ZNF26
Q02880	DNA topoisomerase 2-beta [OS=Homo sapiens]	TOP2B
Q14137	Ribosome biogenesis protein BOP1 [OS=Homo sapiens]	BOP1
Q13137	Calcium-binding and coiled-coil domain-containing protein 2 [OS=Homo sapiens]	CALCOCO2
P15260	Interferon gamma receptor 1 [OS=Homo sapiens]	IFNGR1
Q9H967	WD repeat-containing protein 76 [OS=Homo sapiens]	WDR76
O14976	Cyclin-G-associated kinase [OS=Homo sapiens]	GAK
O43184	Disintegrin and metalloproteinase domain-containing protein 12 [OS=Homo sapiens]	ADAM12
Q6NUI1	Putative coiled-coil domain-containing protein 144 N-terminal-like [OS=Homo sapiens]	CCDC144NL
Q9NW97	Transmembrane protein 51 [OS=Homo sapiens]	TMEM51
Q8TAM6	Ermin [OS=Homo sapiens]	ERMN
P16871	Interleukin-7 receptor subunit alpha [OS=Homo sapiens]	IL7R
Q9BRS2	Serine/threonine-protein kinase RIO1 [OS=Homo sapiens]	RIOK1
Q96S06	Lipase maturation factor 1 [OS=Homo sapiens]	LMF1
O75531	Barrier-to-autointegration factor [OS=Homo sapiens]	BANF1
Q15345	Leucine-rich repeat-containing protein 41 [OS=Homo sapiens]	LRRC41
Q96QP1	Alpha-protein kinase 1 [OS=Homo sapiens]	ALPK1
Q92508	Piezo-type mechanosensitive ion channel component 1 [OS=Homo sapiens]	PIEZO1
Q5VUG0	Scm-like with four MBT domains protein 2 [OS=Homo sapiens]	SFMBT2
Q9BRS8	La-related protein 6 [OS=Homo sapiens]	LARP6
Q9UI12	V-type proton ATPase subunit H [OS=Homo sapiens]	ATP6V1H
Q9Y239	Nucleotide-binding oligomerization domain-containing protein 1 [OS=Homo sapiens]	NOD1
Q9Y4P9	Sperm flagellar protein 1 [OS=Homo sapiens]	SPEF1
A8MPP1	Putative ATP-dependent RNA helicase DDX11-like protein 8 [OS=Homo sapiens]	DDX11L8
Q96QB1	Rho GTPase-activating protein 7 [OS=Homo sapiens]	DLC1
P55316	Forkhead box protein G1 [OS=Homo sapiens]	FOXG1
O43516	WAS/WASL-interacting protein family member 1 [OS=Homo sapiens]	WIPF1
Q8NDV3	Structural maintenance of chromosomes protein 1B [OS=Homo sapiens]
Q9HAP2	MLX-interacting protein [OS=Homo sapiens]	MLXIP
Q16651	Prostasin [OS=Homo sapiens]	PRSS8
Q99592	Zinc finger and BTB domain-containing protein 18 [OS=Homo sapiens]	ZBTB18
Q8NDA8	Maestro heat-like repeat-containing protein family member 1 [OS=Homo sapiens]	MROH1
Q6F5E7	Putative uncharacterized protein TXNRD3NB [OS=Homo sapiens]	TXNRD3NB
Q13442	28 kDa heat- and acid-stable phosphoprotein [OS=Homo sapiens]	PDAP1
Q6DHV5	Protein CC2D2B [OS=Homo sapiens]	CC2D2B
Q6ZMV7	Protein LEKR1 [OS=Homo sapiens]	LEKR1
Q12906	Interleukin enhancer-binding factor 3 [OS=Homo sapiens]	ILF3
P15907	Beta-galactoside alpha-2,6-sialyltransferase 1 [OS=Homo sapiens]	ST6GAL1
Q93033	Immunoglobulin superfamily member 2 [OS=Homo sapiens]	CD101
P08865	40S ribosomal protein SA [OS=Homo sapiens]	RPSA
Q6NS38	DNA oxidative demethylase ALKBH2 [OS=Homo sapiens]	ALKBH2
P26006	Integrin alpha-3 [OS=Homo sapiens]	ITGA3
Q8NEB9	Phosphatidylinositol 3-kinase catalytic subunit type 3 [OS=Homo sapiens]	PIK3C3
P06850	Corticoliberin [OS=Homo sapiens]	CRH
Q9P2M7	Cingulin [OS=Homo sapiens]	CGN
Q14213	Interleukin-27 subunit beta [OS=Homo sapiens]	EBI3
O43734	E3 ubiquitin ligase TRAF3IP2 [OS=Homo sapiens]	TRAF3IP2
Q9UNH7	Sorting nexin-6 [OS=Homo sapiens]	SNX6
Q8IV32	Coiled-coil domain-containing protein 71 [OS=Homo sapiens]	CCDC71
Q9H6F5	Coiled-coil domain-containing protein 86 [OS=Homo sapiens]	CCDC86
Q6P9B6	MTOR-associated protein MEAK7 [OS=Homo sapiens]	MEAK7
P0DMN0	Sulfotransferase 1A4 [OS=Homo sapiens]	SULT1A4
Q8NFX7	Syntaxin-binding protein 6 [OS=Homo sapiens]	STXBP6
P27986	Phosphatidylinositol 3-kinase regulatory subunit alpha [OS=Homo sapiens]	PIK3R1
Q5T764	Interferon-induced protein with tetratricopeptide repeats 1B [OS=Homo sapiens]	IFIT1B
Q15027	Arf-GAP with coiled-coil, ANK repeat and PH domain-containing protein 1 [OS=Homo sapiens]	ACAP1
O43423	Acidic leucine-rich nuclear phosphoprotein 32 family member C [OS=Homo sapiens]	ANP32CP
Q96PE1	Adhesion G protein-coupled receptor A2 [OS=Homo sapiens]	ADGRA2
Q5VU43	Myomegalin [OS=Homo sapiens]	PDE4DIP
Q7Z3V5	Zinc finger protein 571 [OS=Homo sapiens]	ZNF571
Q6UE05	Transmembrane protein 270 [OS=Homo sapiens]	TMEM270
Q9NZJ4	Sacsin [OS=Homo sapiens]	SACS
Q6SJ93	Serine protease FAM111B [OS=Homo sapiens]	FAM111B
Q6VY07	Phosphofurin acidic cluster sorting protein 1 [OS=Homo sapiens]	PACS1
Q86XR2	Protein Niban 3 [OS=Homo sapiens]	NIBAN3
P04626	Receptor tyrosine-protein kinase erbB-2 [OS=Homo sapiens]	ERBB2
P21817	Ryanodine receptor 1 [OS=Homo sapiens]	RYR1
P36543	V-type proton ATPase subunit E 1 [OS=Homo sapiens]	ATP6V1E1
O95876	WD repeat-containing and planar cell polarity effector protein fritz homolog [OS=Homo sapiens]	WDPCP
Q9P0T7	Proton-transporting V-type ATPase complex assembly regulator TMEM9 [OS=Homo sapiens]	TMEM9
P63165	Small ubiquitin-related modifier 1 [OS=Homo sapiens]	SUMO1
Q13613	Myotubularin-related protein 1 [OS=Homo sapiens]	MTMR1
Q9C0I1	Myotubularin-related protein 12 [OS=Homo sapiens]	MTMR12
P29074	Tyrosine-protein phosphatase non-receptor type 4 [OS=Homo sapiens]	PTPN4
Q15849	Urea transporter 2 [OS=Homo sapiens]	SLC14A2
O75436	Vacuolar protein sorting-associated protein 26A [OS=Homo sapiens]	VPS26A
Q16816	Phosphorylase b kinase gamma catalytic chain, skeletal muscle/heart isoform [OS=Homo sapiens]	PHKG1
Q96PB7	Noelin-3 [OS=Homo sapiens]	OLFM3
P29350	Tyrosine-protein phosphatase non-receptor type 6 [OS=Homo sapiens]	PTPN6
Q86VV8	Rotatin [OS=Homo sapiens]	RTTN
A6NMZ7	Collagen alpha-6(VI) chain [OS=Homo sapiens]	COL6A6
Q00169	Phosphatidylinositol transfer protein alpha isoform [OS=Homo sapiens]	PITPNA
Q9UGM3	Deleted in malignant brain tumors 1 protein [OS=Homo sapiens]	DMBT1
Q5THJ4	Intermembrane lipid transfer protein VPS13D [OS=Homo sapiens]	VPS13D
